# Supplementary material for: Data Integration Workflow for Search of Disease Driving Genes and Genetic Variants
Source: PubMed Central journal article supplement (PMC3075259; doi:10.1371/journal.pone.0018636), 2011-04-12

# Survival analysis of rs607230

This marker has a genotype specific effect with a p-value of 5.356426e-03.

Odds ratios have been estimated using logistic regression at  $t \approx 36$ :

$$\frac{P(\text{event}|\text{AT,AA})/P(\text{-event}|\text{AT,AA})}{P(\text{event}|\text{TT})/P(\text{-event}|\text{TT})} \approx 0.354.$$

| genotype | total N | events     | censored   |
|----------|---------|------------|------------|
| TT       | 115     | 96 (0.835) | 19 (0.165) |
| AT,AA    | 92      | 59 (0.641) | 33 (0.359) |

rs607230

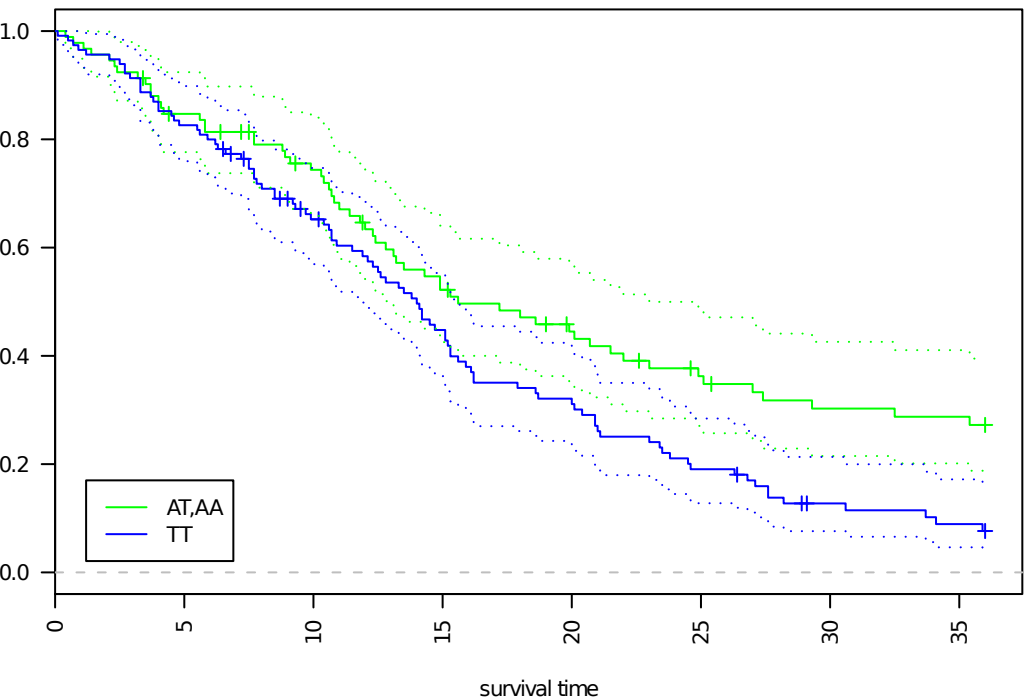

# Survival analysis of rs17532679

This marker has a genotype specific effect with a p-value of 3.726115e-03.

Odds ratios have been estimated using logistic regression at  $t \approx 36$ :

$$\frac{P(\text{event}|\text{AT,TT})/P(\text{-event}|\text{AT,TT})}{P(\text{event}|\text{AA})/P(\text{-event}|\text{AA})} \approx 2.692.$$

| genotype | total N | events     | censored   |
|----------|---------|------------|------------|
| AA       | 131     | 90 (0.687) | 41 (0.313) |
| AT,TT    | 76      | 65 (0.855) | 11 (0.145) |

**rs17532679**

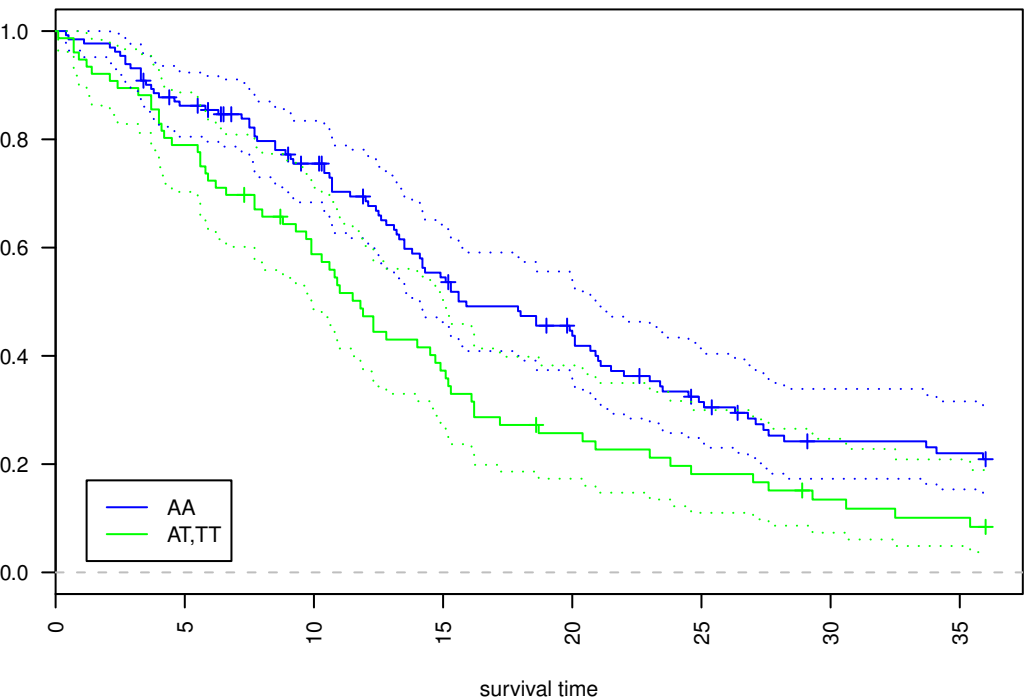

# Survival analysis of rs154238

This marker has a genotype specific effect with a p-value of 9.466737e-03. Total of 1 observation deleted due to missingness.

Odds ratios have been estimated using logistic regression at  $t \approx 36$ :

$$\frac{P(\text{event}|AT,TT)/P(\text{-event}|AT,TT)}{P(\text{event}|AA)/P(\text{-event}|AA)} \approx 1.826.$$

| genotype | total N | events     | censored   |
|----------|---------|------------|------------|
| AA       | 121     | 85 (0.702) | 36 (0.298) |
| AT,TT    | 85      | 69 (0.812) | 16 (0.188) |

**rs154238**

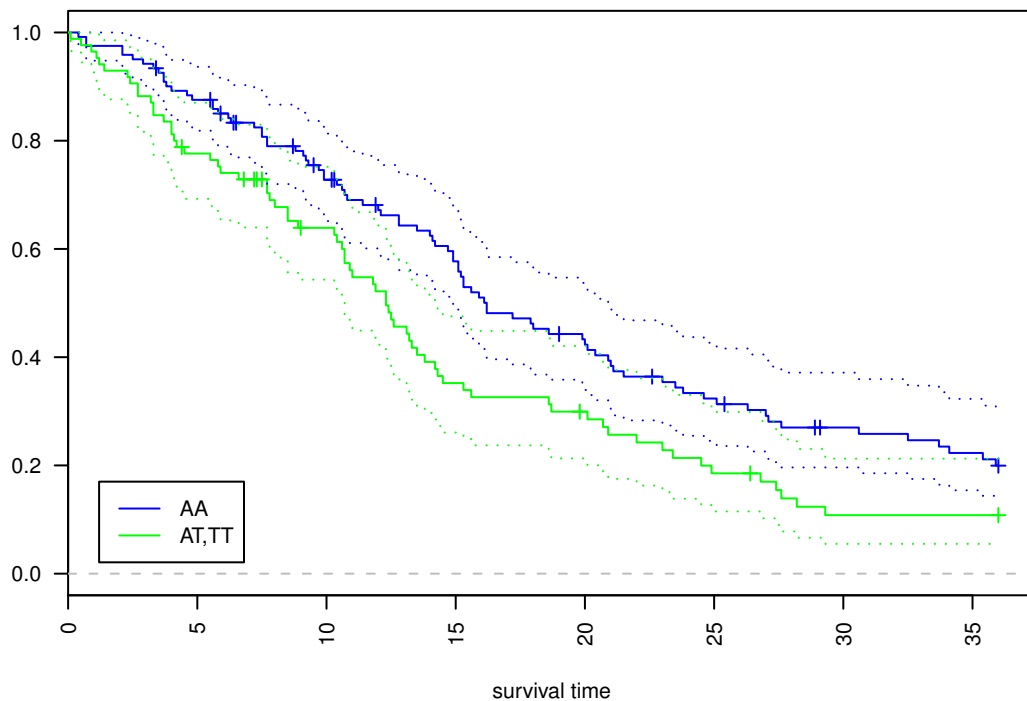

# Survival analysis of rs4561519

This marker has a genotype specific effect with a p-value of 7.774728e-03.

Odds ratios have been estimated using logistic regression at  $t \approx 36$ :

$$\frac{P(\text{event}|\text{AT,AA})/P(\text{-event}|\text{AT,AA})}{P(\text{event}|\text{TT})/P(\text{-event}|\text{TT})} \approx 2.779.$$

| genotype | total N | events     | censored   |
|----------|---------|------------|------------|
| TT       | 141     | 98 (0.695) | 43 (0.305) |
| AT,AA    | 66      | 57 (0.864) | 9 (0.136)  |

## rs4561519

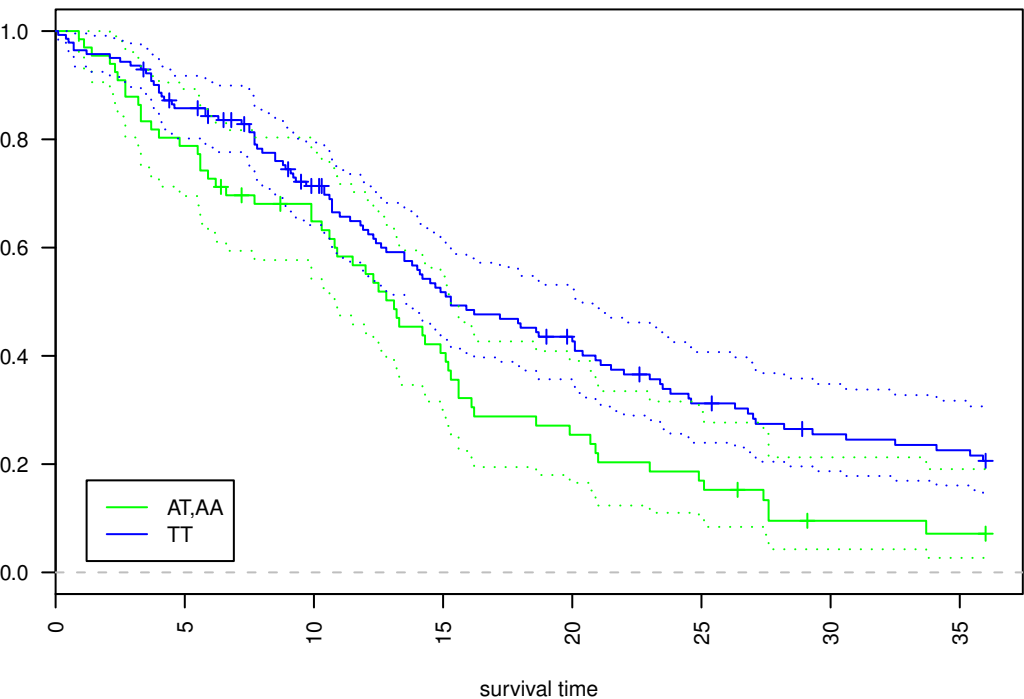

# Survival analysis of rs7236987

This marker has a genotype specific effect with a p-value of 7.135140e-03.

Odds ratios have been estimated using logistic regression at  $t \approx 36$ :

$$\frac{P(\text{event}|\text{AT,TT})/P(\text{-event}|\text{AT,TT})}{P(\text{event}|\text{AA})/P(\text{-event}|\text{AA})} \approx 0.369.$$

| genotype | total N | events     | censored   |
|----------|---------|------------|------------|
| AA       | 155     | 124 (0.8)  | 31 (0.2)   |
| AT,TT    | 52      | 31 (0.596) | 21 (0.404) |

## rs7236987

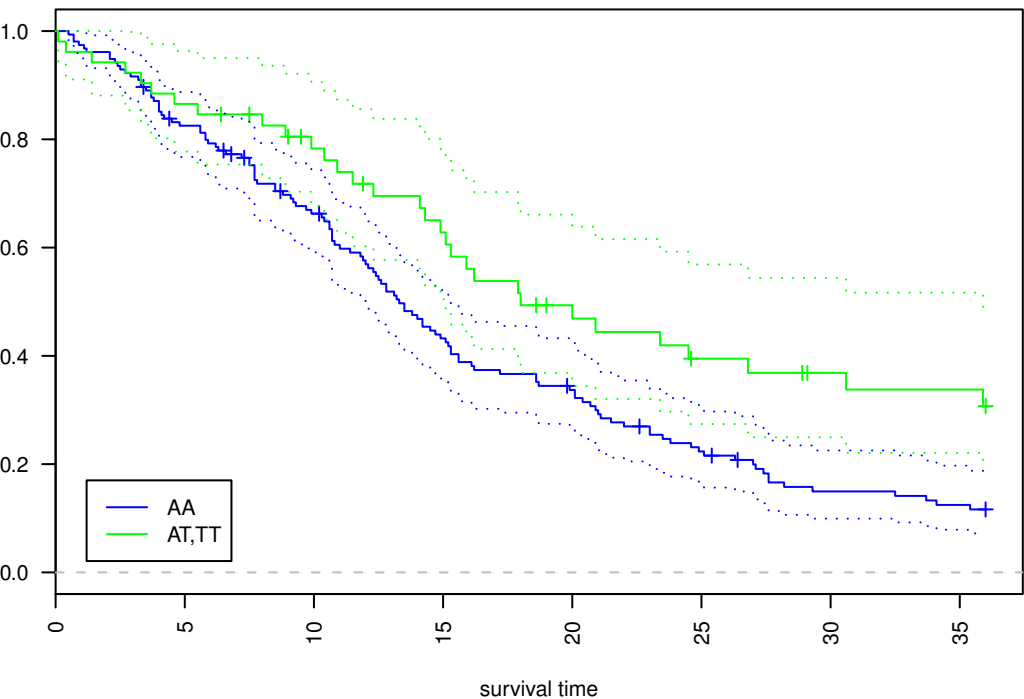

# Survival analysis of rs3809908

This marker has a genotype specific effect with a p-value of 5.311930e-03. Total of 1 observation deleted due to missingness. Odds ratios have been estimated using logistic regression at  $t \approx 36$ :

$$\frac{P(\text{event}|\text{AT,TT})/P(\text{-event}|\text{AT,TT})}{P(\text{event}|\text{AA})/P(\text{-event}|\text{AA})} \approx 0.357.$$

| genotype | total N | events      | censored   |
|----------|---------|-------------|------------|
| AA       | 154     | 124 (0.805) | 30 (0.195) |
| AT,TT    | 52      | 31 (0.596)  | 21 (0.404) |

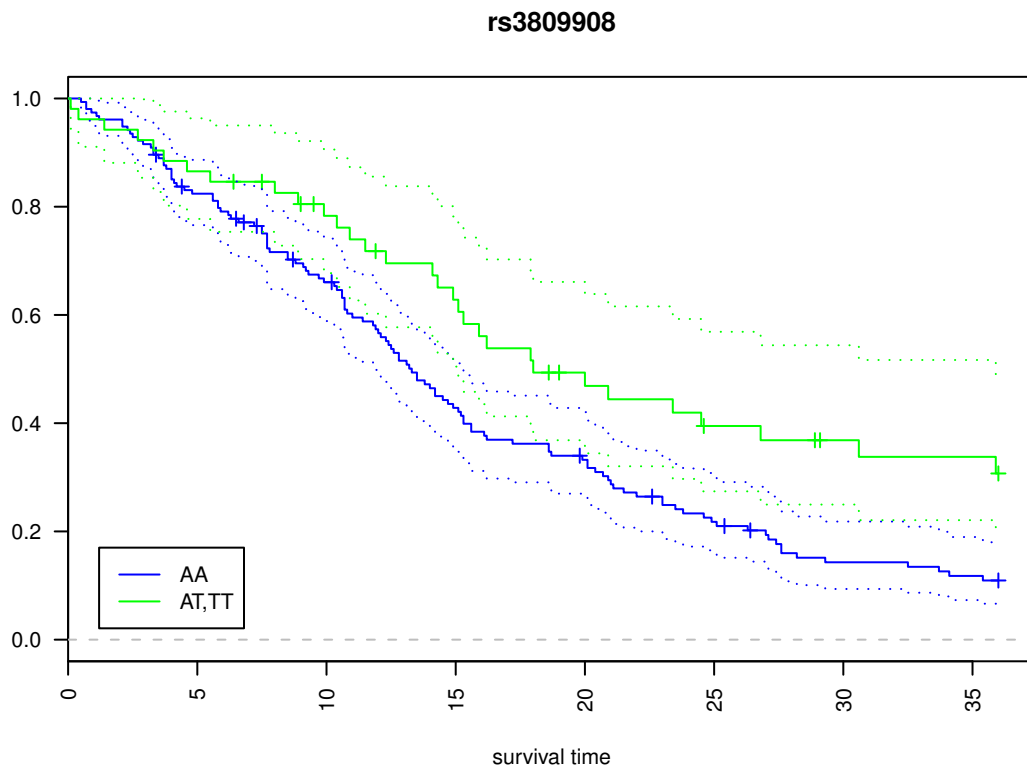

# Survival analysis of rs6077759

This marker has a genotype specific effect with a p-value of 3.812266e-03.

Odds ratios have been estimated using logistic regression at  $t \approx 36$ :

$$\frac{P(\text{event}|\text{AT})/P(\text{-event}|\text{AT})}{P(\text{event}|\text{AA})/P(\text{-event}|\text{AA})} \approx 1.634 \text{ and } \frac{P(\text{event}|\text{TT})/P(\text{-event}|\text{TT})}{P(\text{event}|\text{AA})/P(\text{-event}|\text{AA})} \approx 2.93.$$

| genotype | total N | events     | censored   |
|----------|---------|------------|------------|
| AA       | 103     | 71 (0.689) | 32 (0.311) |
| AT       | 74      | 58 (0.784) | 16 (0.216) |
| TT       | 30      | 26 (0.867) | 4 (0.133)  |

## rs6077759

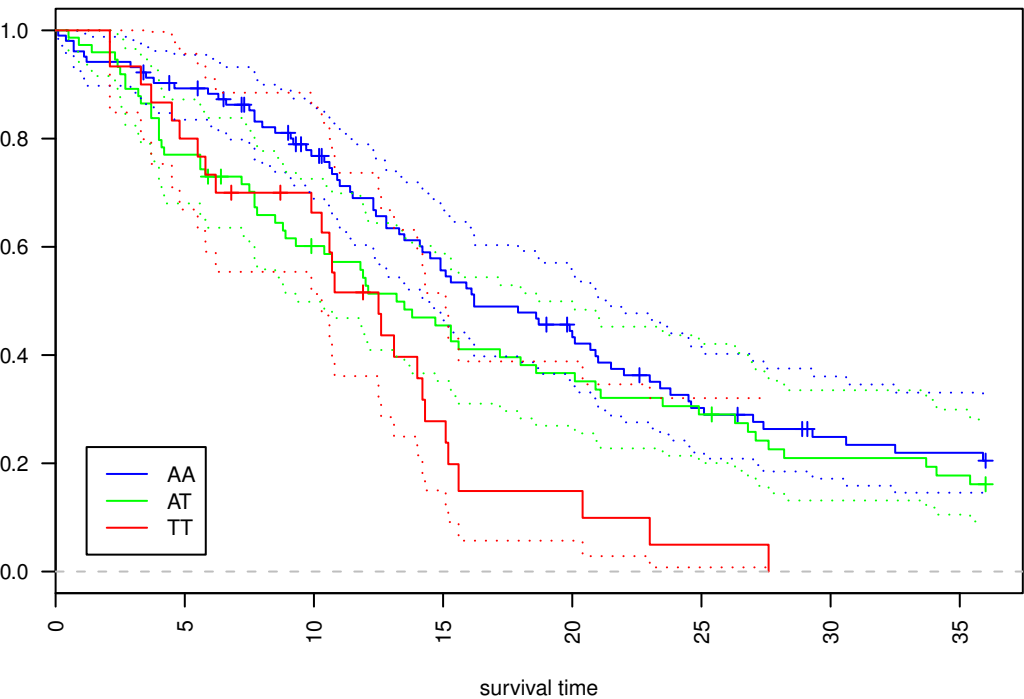

# Survival analysis of rs6772

This marker has a genotype specific effect with a p-value of 7.746774e-03.

Odds ratios have been estimated using logistic regression at  $t \approx 36$ :

$$\frac{P(\text{event}|\text{AT,AA}) / P(\text{-event}|\text{AT,AA})}{P(\text{event}|\text{TT}) / P(\text{-event}|\text{TT})} \approx 0.412.$$

| genotype | total N | events      | censored   |
|----------|---------|-------------|------------|
| TT       | 125     | 102 (0.816) | 23 (0.184) |
| AT,AA    | 82      | 53 (0.646)  | 29 (0.354) |

rs6772

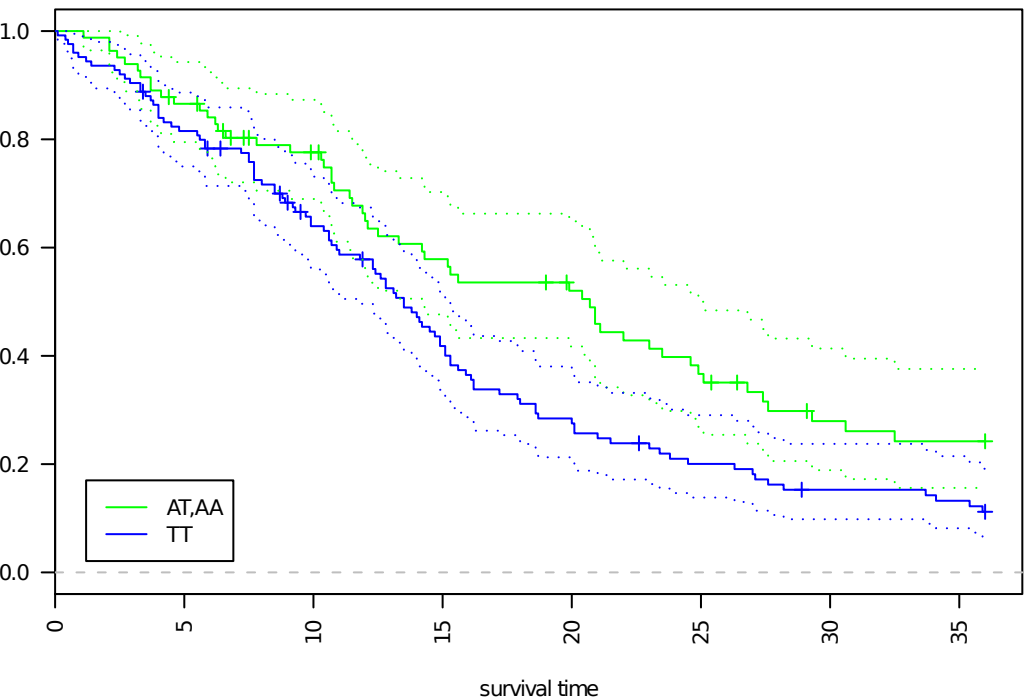



# Survival analysis of rs11242316

This marker has a genotype specific effect with a p-value of 7.062309e-03.

Odds ratios have been estimated using logistic regression at  $t \approx 36$ :

$$\frac{P(\text{event}|\text{AT})/P(\text{-event}|\text{AT})}{P(\text{event}|\text{TT})/P(\text{-event}|\text{TT})} \approx 2.047 \text{ and } \frac{P(\text{event}|\text{AA})/P(\text{-event}|\text{AA})}{P(\text{event}|\text{TT})/P(\text{-event}|\text{TT})} \approx 0.746.$$

| genotype | total N | events     | censored   |
|----------|---------|------------|------------|
| TT       | 113     | 81 (0.717) | 32 (0.283) |
| AT       | 68      | 57 (0.838) | 11 (0.162) |
| AA       | 26      | 17 (0.654) | 9 (0.346)  |

rs11242316

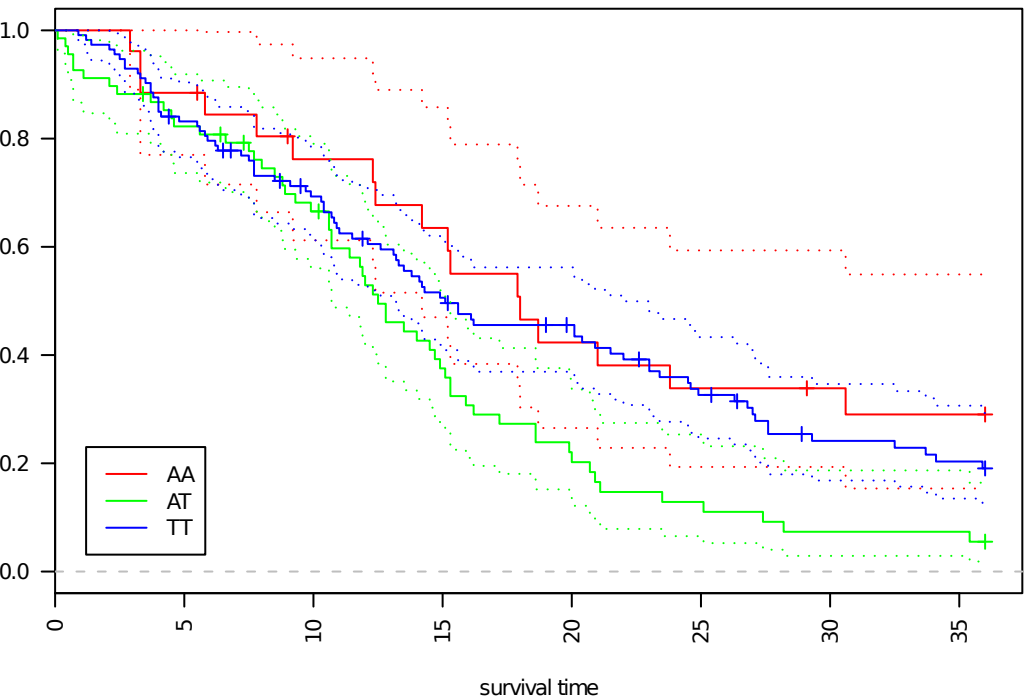

# Survival analysis of rs10158222

This marker has a genotype specific effect with a p-value of 4.042413e-03.

Odds ratios have been estimated using logistic regression at  $t \approx 36$ :

$$\frac{P(\text{event}|AT,TT)/P(\text{-event}|AT,TT)}{P(\text{event}|AA)/P(\text{-event}|AA)} \approx 0.632.$$

| genotype | total N | events     | censored   |
|----------|---------|------------|------------|
| AA       | 121     | 95 (0.785) | 26 (0.215) |
| AT,TT    | 86      | 60 (0.698) | 26 (0.302) |

rs10158222

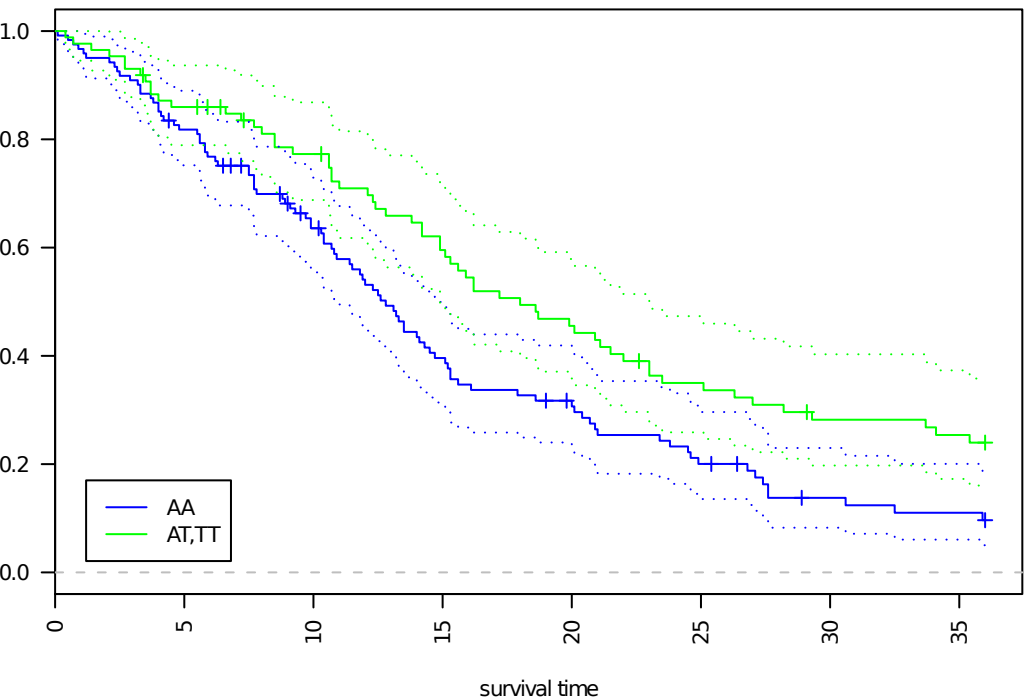

# Survival analysis of rs10045073

This marker has a genotype specific effect with a p-value of 9.680628e-03.

Odds ratios have been estimated using logistic regression at  $t \approx 36$ :

$$\frac{P(\text{event}|\text{AT})/P(\text{-event}|\text{AT})}{P(\text{event}|\text{TT})/P(\text{-event}|\text{TT})} \approx 1.963 \text{ and } \frac{P(\text{event}|\text{AA})/P(\text{-event}|\text{AA})}{P(\text{event}|\text{TT})/P(\text{-event}|\text{TT})} \approx 0.685.$$

| genotype | total N | events     | censored   |
|----------|---------|------------|------------|
| TT       | 115     | 83 (0.722) | 32 (0.278) |
| AT       | 67      | 56 (0.836) | 11 (0.164) |
| AA       | 25      | 16 (0.64)  | 9 (0.36)   |

rs10045073

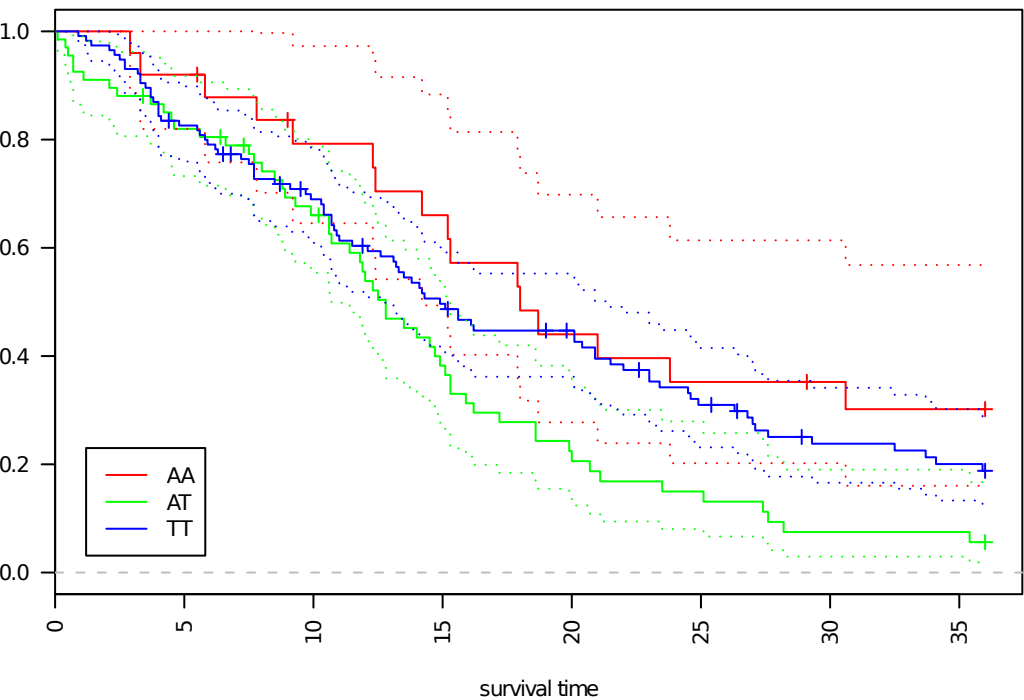

# Survival analysis of rs7107335

This marker has a genotype specific effect with a p-value of 4.849804e-03. Total of 1 observation deleted due to missingness.

Odds ratios have been estimated using logistic regression at  $t \approx 36$ :

$$\frac{P(\text{event}|\text{AT,AA})/P(\text{-event}|\text{AT,AA})}{P(\text{event}|\text{TT})/P(\text{-event}|\text{TT})} \approx 0.554.$$

| genotype | total N | events      | censored   |
|----------|---------|-------------|------------|
| TT       | 136     | 107 (0.787) | 29 (0.213) |
| AT,AA    | 70      | 47 (0.671)  | 23 (0.329) |

rs7107335

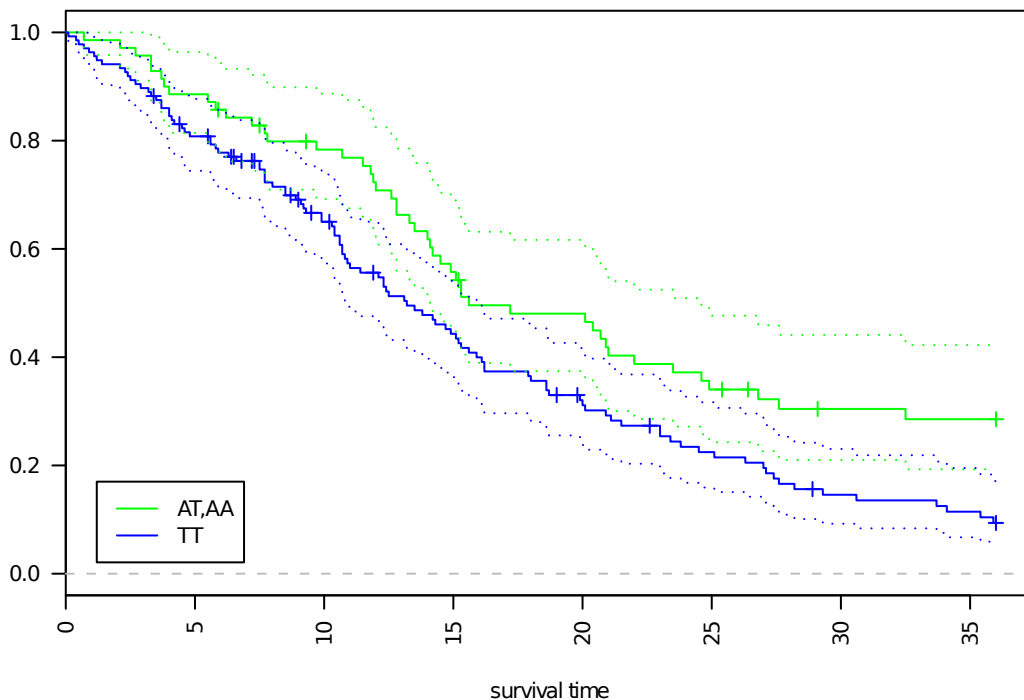

# Survival analysis of rs6886699

This marker has a genotype specific effect with a p-value of 9.597962e-03.

Odds ratios have been estimated using logistic regression at  $t \approx 36$ :

$$\frac{P(\text{event}|\text{AT})/P(\text{-event}|\text{AT})}{P(\text{event}|\text{TT})/P(\text{-event}|\text{TT})} \approx 2.085 \text{ and } \frac{P(\text{event}|\text{AA})/P(\text{-event}|\text{AA})}{P(\text{event}|\text{TT})/P(\text{-event}|\text{TT})} \approx 0.805.$$

| genotype | total N | events     | censored   |
|----------|---------|------------|------------|
| TT       | 115     | 82 (0.713) | 33 (0.287) |
| AT       | 68      | 57 (0.838) | 11 (0.162) |
| AA       | 24      | 16 (0.667) | 8 (0.333)  |

rs6886699

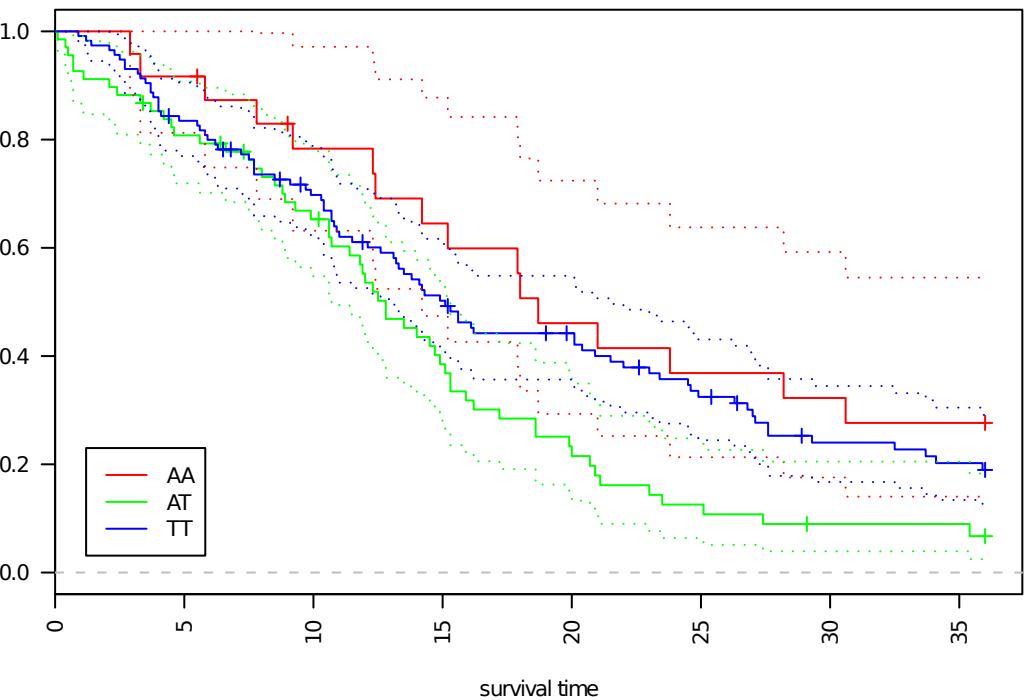

# Survival analysis of rs3734125

This marker has a genotype specific effect with a p-value of 2.445427e-03.

Odds ratios have been estimated using logistic regression at  $t \approx 36$ :

$$\frac{P(\text{event}|\text{AT})/P(\text{-event}|\text{AT})}{P(\text{event}|\text{TT})/P(\text{-event}|\text{TT})} \approx 2.083 \text{ and } \frac{P(\text{event}|\text{AA})/P(\text{-event}|\text{AA})}{P(\text{event}|\text{TT})/P(\text{-event}|\text{TT})} \approx 0.702.$$

| genotype | total N | events     | censored   |
|----------|---------|------------|------------|
| TT       | 113     | 81 (0.717) | 32 (0.283) |
| AT       | 69      | 58 (0.841) | 11 (0.159) |
| AA       | 25      | 16 (0.64)  | 9 (0.36)   |

rs3734125

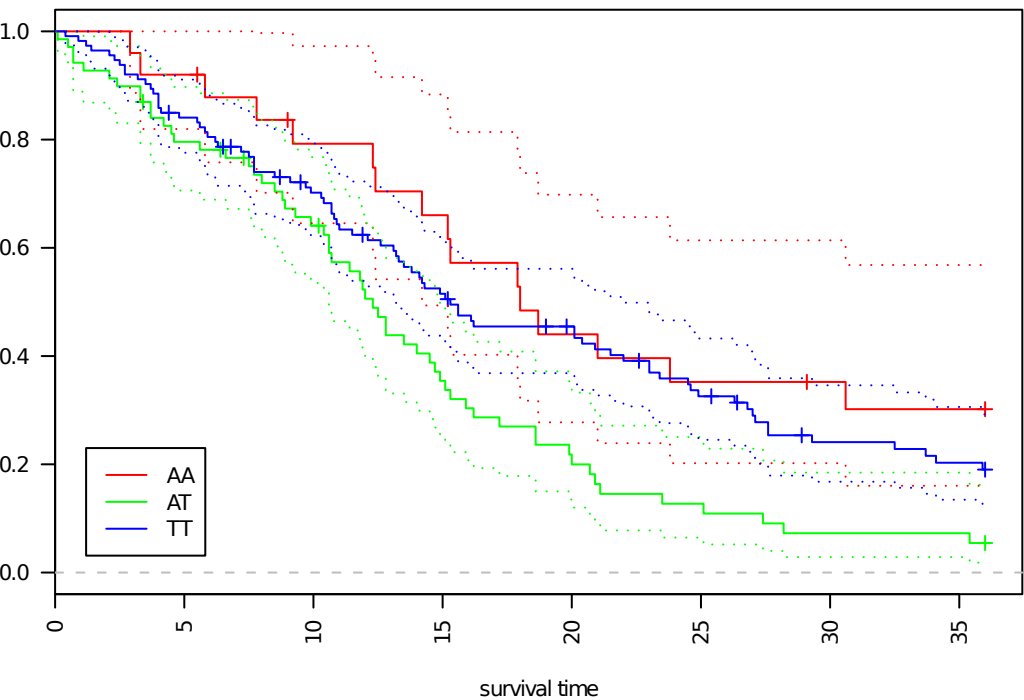

# Survival analysis of rs3733619

This marker has a genotype specific effect with a p-value of 6.766583e-03.

Odds ratios have been estimated using logistic regression at  $t \approx 36$ :

$$\frac{P(\text{event}|AT,AA)/P(\text{-event}|AT,AA)}{P(\text{event}|TT)/P(\text{-event}|TT)} \approx 5.681.$$

| genotype | total N | events      | censored   |
|----------|---------|-------------|------------|
| TT       | 164     | 115 (0.701) | 49 (0.299) |
| AT,AA    | 43      | 40 (0.93)   | 3 (0.0698) |

rs3733619

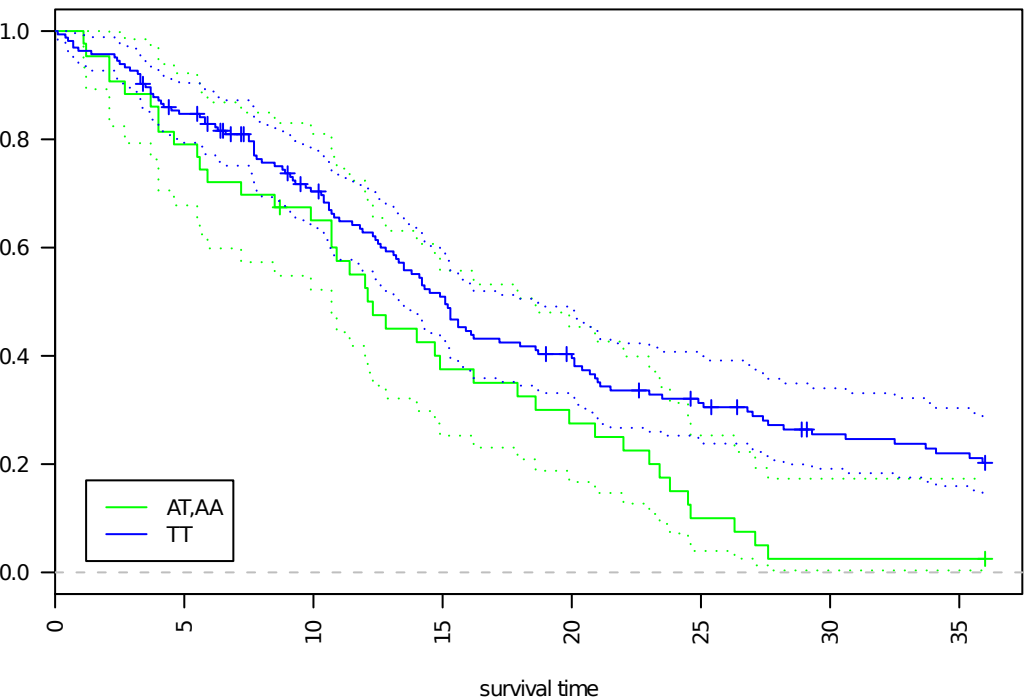

# Survival analysis of rs2491237

This marker has a genotype specific effect with a p-value of 5.246671e-03.

Odds ratios have been estimated using logistic regression at  $t \approx 36$ :

$$\frac{P(\text{event}|\text{AT,AA})/P(\text{-event}|\text{AT,AA})}{P(\text{event}|\text{TT})/P(\text{-event}|\text{TT})} \approx 0.412.$$

| genotype | total N | events      | censored   |
|----------|---------|-------------|------------|
| TT       | 125     | 102 (0.816) | 23 (0.184) |
| AT,AA    | 82      | 53 (0.646)  | 29 (0.354) |

rs2491237

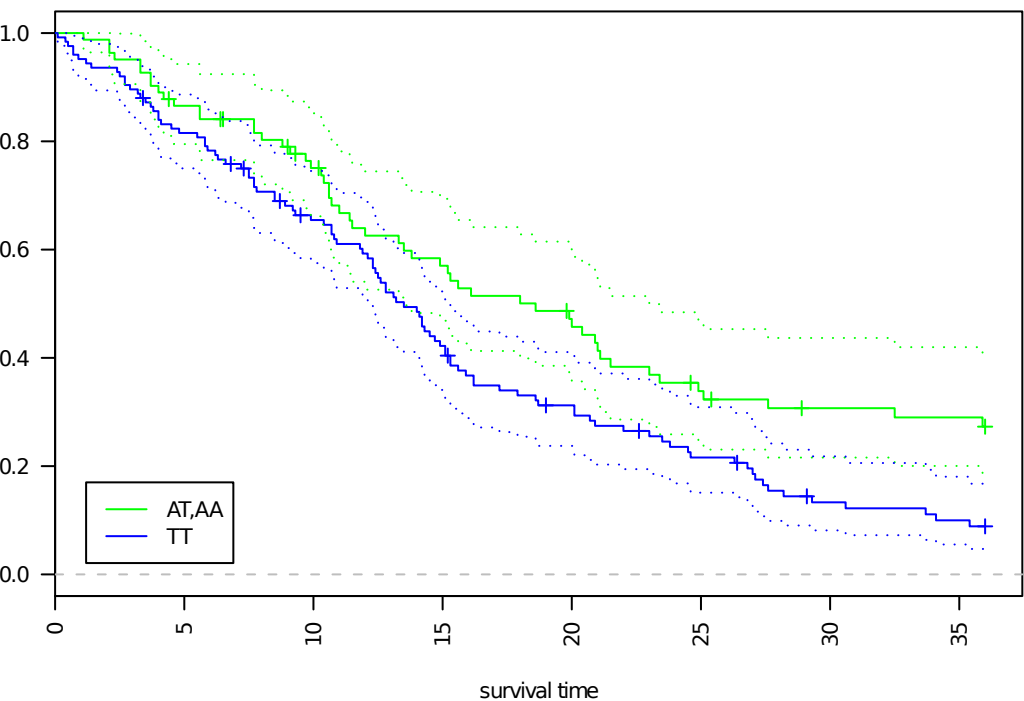

Supplement: pone.0018636.s001.pdf [file pone.0018636.s001.pdf]
