# Supplementary material for: Data Integration Workflow for Search of Disease Driving Genes and Genetic Variants
Source: PLoS One. 2011 Apr 12;6(4):e18636. doi: 10.1371/journal.pone.0018636 (PMC3075259; doi:10.1371/journal.pone.0018636)
Supplement: Table S1 — The complete description of annotations from both ENSEMBL Perl and BioMart interfaces. (XLS) [file pone.0018636.s002.xls]

## Sheet: Sheet1
CANGES SNP annotation name	BioMart implementation	Perl implementation
GeneId	Ensembl Gene if	-
RsNum	-	SNP rs-number or Ensembl SNP id
Type	Variation type (snp, indel, microsatellite, etc.)	Variation type (snp, indel, microsatellite, etc.)
Chromosome	Chromosome name	Chromosome name
Consequence	The SNP’s clinical consequence such as defined by Ensembl	The SNP’s clinical consequence such as defined by Ensembl
SNPStrand	DNA strand. (1 for forward strand, -1 for reverse)	DNA strand. (1 for forward strand, -1 for reverse)
Alleles	Change of alleles in genomic sequence caused by the SNP	Change of alleles in genomic sequence caused by the SNP
TranscriptId	Transcript ids where SNP was found	Transcript ids where SNP was found
TranscriptStart/TransLocationStart	Start location in cDNA	Start location in cDNA
TranscriptEnd/TransLocationEnd	End location in cDNA	End location in cDNA
InterproAC	Interpro accession number for domain that SNP hits	-
DomainSource	Name of the domain source	-
DomainName	Name of the domain	-
HitsDomain	-	Indicator 1, if SNP is within a protein domain
DomainDescr	-	Free description of protein domains
ChromosomeBP/GenomLocationStart	SNP start location in genome	SNP start location in genome
GenomLocationEnd	-	SNP end location in genome
SurroundingDNA	DNA sequences surrounding the SNP
PreGenSeq	-	Genomic sequence preceding the SNP
SuccGenSeq	-	Genomic sequence following the SNP
PeptAlleles	Change of alleles in peptide sequence caused by the SNP	Change of alleles in peptide sequence caused by the SNP
PeptideStart/PeptLocationStart	SNP start location in peptide sequence	SNP start location in peptide sequence
PeptideEnd/PeptLocationEnd	SNP end location in peptide sequence	SNP end location in peptide sequence
SurroundingPeptide	Peptide sequences surrounding the SNP
PrePepSeq	-	Peptide sequence preceding the SNP
SuccPepSeq	-	Peptide sequence following the SNP
GenSymbol	Abbreviated gene symbol	Abbreviated gene symbol
SearchTerm	Search term used	Search term used
MinorAllele	Minor allele frequency from the selected Hapmap population	Minor allele frequency from the selected Hapmap population
TagSNPs_[Hapmap population identificator] *	List of tagSNPs from the Hapmap database.	List of tagSNPs from the Hapmap database.
* The dentificator is printed to the header by the selected database.
