# Supplementary material for: Data Integration Workflow for Search of Disease Driving Genes and Genetic Variants
Source: PLoS One. 2011 Apr 12;6(4):e18636. doi: 10.1371/journal.pone.0018636 (PMC3075259; doi:10.1371/journal.pone.0018636)
Supplement: Table S3 — The list p53 focal genes' coding SNPs that all prediction methods in CANGES estimate of being functional. (XLS) [file pone.0018636.s004.xls]

## Sheet: Sheet1
RsNum	Type	Consequence	SNPStrand	Alleles	TransLocationStart	TransLocationEnd	HitsDomain	DomainDescr	GenomLocationStart	GenomLocationEnd	PreGenSeq	SuccGenSeq	PeptAlleles	PeptLocationStart	PeptLocationEnd	PrePepSeq	SuccPepSeq	GenSymbol	SearchTerm	MinorAllele	TagSNPs_CEU	SiftPrediction	PolyPhen1	PolyPhen2	SNPs3D_profile
rs1805345	snp	NON_SYNONYMOUS_CODING	1	G/T	1059	1059	1	IPR003078,Prints,Retinoic_acid_rcpt;IPR000536,Pfam,Nucl_hrmn_rcpt_lig-bd_core;IPR008946,Superfamily,Nucl_hormone_rcpt_ligand-bd;	137321050	137321050	GCTGCACGTCCACCGGAACA	CGCCCACAGCGCAGGGGTGG	S/I	336	336	RSIAVKDGILLATGLHVHRN	AHSAGVGAIFDRVLTELVSK	RXRA	P19793	NA	NA	0	possibly damaging	probably damaging	-1.0
rs11659145	snp	NON_SYNONYMOUS_CODING	1	C/T	8724	8724	-	-	7704906	7704906	CCCTTCCCAGGAACTGGATC	GCCAGTACCCAGCCTTGGTG	R/C	2904	2904	NNLHIVLCLSPMGDPFRNWI	QYPALVNCTTINWFSEWPQE	DNAH2	Q9P225	0.0	NA	0	probably damaging	probably damaging	-1.0
rs2309808	snp	NON_SYNONYMOUS_CODING	1	G/A	8725	8725	-	-	7704907	7704907	CCTTCCCAGGAACTGGATCC	CCAGTACCCAGCCTTGGTGA	R/H	2904	2904	NNLHIVLCLSPMGDPFRNWI	QYPALVNCTTINWFSEWPQE	DNAH2	Q9P225	NA	NA	0	probably damaging	probably damaging	-1.0
rs5272	snp	NON_SYNONYMOUS_CODING	1	T/C	1596	1596	1	IPR019791,Prints,Haem_peroxidase_animal_sg;IPR002007,pfscan,Haem_peroxidase_animal;IPR010255,Superfamily,Haem_peroxidase;	186643837	186643837	TGGTGACATCGATGCTGTGG	GCTGTATCCTGCCCTTCTGG	E/G	488	488	TGEKEMSAELEALYGDIDAV	LYPALLVEKPRPDAIFGETM	PTGS2	P35354	NA	NA	0	probably damaging	probably damaging	-1.0
rs2235361	snp	NON_SYNONYMOUS_CODING	1	T/C	3043	3043	1	IPR016279,PIRSF,PLC-gamma;	39800870	39800870	AATGGAACGGAGGAAGAAGA	TGCCCTGGAGCTCTCTGAAC	I/T	949	949	VAQTADARLTEGKIMERRKK	ALELSELVVYCRPVPFDEEK	PLCG1	Q4LE43	NA	NA	0	probably damaging	possibly damaging	-1.0
rs1803323	snp	NON_SYNONYMOUS_CODING	1	C/G	1544	1544	1	-	39918323	39918323	TTCTCTGTGGGTCTGCCCGT	CCAAACCTTACGATCCTCCT	P/A	258	258	TRGSPNRSLPSPGVLCGSAR	KPYDPPGEKMVAAKVKGEKL	ATF4	P18848	NA	NA	0.01	possibly damaging	probably damaging	-0.34
rs17881753	snp	NON_SYNONYMOUS_CODING	1	C/T	2416	2416	-	-	29553484	29553484	AGGATGCAGCGGAACCCCCC	GATTTGCCGACAAGCCCAGA	P/L	678	678	LRKGKGNSSMDSAAGCSGTP	ICRQAQTKLEVALYMFLWNP	NF1	P21359	NA	NA	0	possibly damaging	possibly damaging	-0.65
rs28897701	snp	NON_SYNONYMOUS_CODING	1	G/C	456	456	1	-	32893369	32893369	AACCATCTTATAATCAGCTG	CTTCAACTCCAATAATATTC	A/P	75	75	NNYEPNLFKTPQRKPSYNQL	STPIIFKEQGLTLPLYQSPV	BRCA2	P51587	NA	NA	0.05	possibly damaging	possibly damaging	-1.0
rs28897705	snp	NON_SYNONYMOUS_CODING	1	T/G	1064	1064	1	-	32906446	32906446	GGGAATTCATTTAAAGTAAA	AGCTGCAAAGACCACATTGG	N/K	277	277	NQREAASHGFGKTSGNSFKV	SCKDHIGKSMPNVLEDEVYE	BRCA2	P51587	NA	NA	0.02	probably damaging	probably damaging	-1.0
rs28897712	snp	NON_SYNONYMOUS_CODING	1	C/G	2197	2197	1	-	32910456	32910456	ACAGAATGATTCTGAAGAAC	AACTTTGTCCTTAACTAGCT	P/R	655	655	DSGLLHSSVKRSCSQNDSEE	TLSLTSSFGTILRKCSRNET	BRCA2	P51587	NA	NA	0.02	possibly damaging	probably damaging	-0.86
rs11571656	snp	NON_SYNONYMOUS_CODING	1	C/T	3160	3160	1	-	32911419	32911419	AGATTTAAAATCGGACATCT	CTTGAATATAGATAAAATAC	S/F	976	976	KNSVKQHIKMTLGQDLKSDI	LNIDKIPEKNNDYMNKWAGL	BRCA2	P51587	0.0	NA	0.02	possibly damaging	possibly damaging	-0.73
rs28897719	snp	NON_SYNONYMOUS_CODING	1	A/T	3537	3537	1	-	32911796	32911796	AGGATTTTAATTCAAACCAT	ATTTAACACCTAGCCAAAAG	N/Y	1102	1102	KNSHITPQMLFSKQDFNSNH	LTPSQKAEITELSTILEESG	BRCA2	P51587	NA	NA	0.02	probably damaging	probably damaging	-1.0
rs28897727	mixed	FRAMESHIFT_CODING	1	G/T/-	4491	4491	-	-	32912750	32912750	AAACGGAGCAAAATATAAAA	ATTTTGAGACTTCTGATACA	-	1420	1420	HGNTSNKEQLTATKTEQNIK	FETSDTFFQTASGKNISVAK	BRCA2	P51587	NA	NA	0.03	probably damaging	probably damaging	-0.94
rs28897728	snp	NON_SYNONYMOUS_CODING	1	G/A	4818	4818	1	IPR002093,pfscan,BRCA2_repeat;	32913077	32913077	TGGGTTTTCATACAGCTAGC	GGAAAAAAGTTAAAATTGCA	G/R	1529	1529	QPERDEKIKEPTLLGFHTAS	KKVKIAKESLDKVKNLFDEK	BRCA2	P51587	NA	NA	0	probably damaging	probably damaging	-1.0
rs28897733	snp	NON_SYNONYMOUS_CODING	1	A/C	5266	5266	1	IPR002093,pfscan,BRCA2_repeat;	32913525	32913525	TTACACAAGTTGTAGTAGAA	AACTTCTGTGAGTCAGACTT	K/T	1678	1678	QSPYSVIENSALAFYTSCSR	TSVSQTSLLEAKKWLREGIF	BRCA2	P51587	NA	NA	0.03	possibly damaging	possibly damaging	-0.66
rs28897737	snp	NON_SYNONYMOUS_CODING	1	C/G	6170	6170	1	IPR002093,pfscan,BRCA2_repeat;	32914429	32914429	AATACTTGTGGGATTTTTAG	ACAGCAAGTGGAAAATCTGT	S/R	1979	1979	KCSIGKLHKSVSSANTCGIF	TASGKSVQVSDASLQNARQV	BRCA2	P51587	NA	NA	0.01	possibly damaging	possibly damaging	-1.0
rs28897744	snp	NON_SYNONYMOUS_CODING	1	C/T	7777	7777	1	IPR015252,Superfamily,DNA_recomb/repair_BRCA2_hlx;IPR015252,Pfam,DNA_recomb/repair_BRCA2_hlx;	32930673	32930673	CAGTCTGTATCTTGCAAAAA	ATCCACTCTGCCTCGAATCT	T/I	2515	2515	IKKKQRQRVFPQPGSLYLAK	STLPRISLKAAVGGQVPSAC	BRCA2	P51587	0.01	NA	0.01	possibly damaging	possibly damaging	-1.0
rs169548	snp	NON_SYNONYMOUS_CODING	1	T/C	7839	7839	1	IPR015252,Superfamily,DNA_recomb/repair_BRCA2_hlx;IPR015252,Pfam,DNA_recomb/repair_BRCA2_hlx;	32930735	32930735	GCCAAGTTCCCTCTGCGTGT	CTCATAAACAGGTATGTGTT	S/P	2536	2536	STLPRISLKAAVGGQVPSAC	HKQLYTYGVSKHCIKINSKN	BRCA2	P51587	NA	NA	0	possibly damaging	possibly damaging	-0.9
rs28897745	snp	NON_SYNONYMOUS_CODING	1	A/G	8227	8227	1	IPR015252,Superfamily,DNA_recomb/repair_BRCA2_hlx;IPR015252,Pfam,DNA_recomb/repair_BRCA2_hlx;	32937333	32937333	TAGATATGATACGGAAATTG	TAGAAGCAGAAGATCGGCTA	D/G	2665	2665	RCLSPERVLLQLKYRYDTEI	RSRRSAIKKIMERDDTAAKT	BRCA2	P51587	NA	NA	0	probably damaging	probably damaging	-1.0
rs28897746	snp	NON_SYNONYMOUS_CODING	1	T/C	8290	8290	1	IPR011370,PIRSF,DNA_recomb/repair_BRCA2;IPR015187,Pfam,BRCA-2_OB_1;	32937396	32937396	TGACACAGCTGCAAAAACAC	TGTTCTCTGTGTTTCTGACA	L/P	2686	2686	RSRRSAIKKIMERDDTAAKT	VLCVSDIISLSANISETSSN	BRCA2	P51587	NA	NA	0	probably damaging	probably damaging	-1.0
rs28897748	snp	NON_SYNONYMOUS_CODING	1	T/C	8389	8389	1	IPR011370,PIRSF,DNA_recomb/repair_BRCA2;IPR015187,Pfam,BRCA-2_OB_1;	32937495	32937495	TACCCAAAAAGTGGCCATTA	TGAACTTACAGATGGGTGGT	I/T	2719	2719	NISETSSNKTSSADTQKVAI	ELTDGWYAVKAQLDPPLLAV	BRCA2	P51587	NA	NA	0	possibly damaging	possibly damaging	-1.0
rs28897750	snp	NON_SYNONYMOUS_CODING	1	C/A	8542	8542	1	IPR011370,PIRSF,DNA_recomb/repair_BRCA2;IPR015187,Pfam,BRCA-2_OB_1;	32937648	32937648	TGCCTGTACACCTCTTGAAG	CCCAGAATCTCTTATGTTAA	A/D	2770	2770	KIILHGAELVGSPDACTPLE	PESLMLKISANSTRPARWYT	BRCA2	P51587	0.0	NA	0	probably damaging	possibly damaging	-1.0
rs28897751	snp	NON_SYNONYMOUS_CODING	1	T/C	8608	8608	1	IPR011370,PIRSF,DNA_recomb/repair_BRCA2;IPR015187,Pfam,BRCA-2_OB_1;	32944582	32944582	TGCTCGCTGGTATACCAAAC	TGGATTCTTTCCTGACCCTA	L/P	2792	2792	ESLMLKISANSTRPARWYTK	GFFPDPRPFPLPLSSLFSDG	BRCA2	P51587	NA	NA	0	probably damaging	probably damaging	-1.0
rs28897752	snp	NON_SYNONYMOUS_CODING	1	T/C	8926	8926	1	IPR011370,PIRSF,DNA_recomb/repair_BRCA2;	32950867	32950867	AAGACAGCAAGTTCGTGCTT	GCAAGATGGTGCAGAGCTTT	L/S	2898	2898	ENTTKPYLPSRALTRQQVRA	QDGAELYEAVKNAADPAYLE	BRCA2	P51587	NA	NA	0	probably damaging	probably damaging	-1.0
rs28897753	snp	NON_SYNONYMOUS_CODING	1	T/G	8956	8956	1	IPR011370,PIRSF,DNA_recomb/repair_BRCA2;	32950897	32950897	TGCAGAGCTTTATGAAGCAG	GAAGAATGCAGCAGACCCAG	V/G	2908	2908	RALTRQQVRALQDGAELYEA	KNAADPAYLEGYFSEEQLRA	BRCA2	P51587	NA	NA	0	probably damaging	probably damaging	-1.0
rs4987047	snp	NON_SYNONYMOUS_CODING	1	A/T	9063	9063	1	IPR011370,PIRSF,DNA_recomb/repair_BRCA2;	32953529	32953529	ATGATAAGAAACAAGCTCAG	TCCAGTTGGAAATTAGGAAG	I/F	2944	2944	EQLRALNNHRQMLNDKKQAQ	QLEIRKAMESAEQKEQGLSR	BRCA2	P51587	NA	NA	0.01	possibly damaging	possibly damaging	-0.23
rs28897754	snp	NON_SYNONYMOUS_CODING	1	G/T	9083	9083	1	IPR011370,PIRSF,DNA_recomb/repair_BRCA2;	32953549	32953549	ATCCAGTTGGAAATTAGGAA	GCCATGGAATCTGCTGAACA	K/N	2950	2950	NNHRQMLNDKKQAQIQLEIR	AMESAEQKEQGLSRDVTTVW	BRCA2	P51587	NA	NA	0	possibly damaging	possibly damaging	-0.82
rs11571769	snp	NON_SYNONYMOUS_CODING	1	G/A	9084	9084	1	IPR011370,PIRSF,DNA_recomb/repair_BRCA2;	32953550	32953550	TCCAGTTGGAAATTAGGAAG	CCATGGAATCTGCTGAACAA	A/T	2951	2951	NHRQMLNDKKQAQIQLEIRK	MESAEQKEQGLSRDVTTVWK	BRCA2	P51587	0.01	NA	0	possibly damaging	possibly damaging	-1.0
rs28897758	snp	NON_SYNONYMOUS_CODING	1	T/G	9535	9535	1	IPR011370,PIRSF,DNA_recomb/repair_BRCA2;IPR015188,Pfam,BRCA-2_OB_3;	32968871	32968871	AGACGAATGTTACAATTTAC	GGCAATAAAGTTTTGGATAG	L/R	3101	3101	VVKKTGLAPFVYLSDECYNL	AIKFWIDLNEDIIKPHMLIA	BRCA2	P51587	NA	NA	0	probably damaging	probably damaging	-1.0
rs28897759	snp	NON_SYNONYMOUS_CODING	1	A/T	9604	9604	1	IPR011370,PIRSF,DNA_recomb/repair_BRCA2;IPR015188,Pfam,BRCA-2_OB_3;	32968940	32968940	TATGTTAATTGCTGCAAGCA	CCTCCAGTGGCGACCAGAAT	N/I	3124	3124	KFWIDLNEDIIKPHMLIAAS	LQWRPESKSGLLTLFAGDFS	BRCA2	P51587	NA	NA	0	probably damaging	probably damaging	-1.0
rs28897761	snp	STOP_GAINED	1	G/T	10257	10257	-	-	32972674	32972674	AAAGTAATTCAATAGCTGAC	AAGAACTTGCATTGATAAAT	E/*	3342	3342	MTPFKKFNEISLLESNSIAD	ELALINTQALLSGSTGEKQF	BRCA2	P51587	NA	NA	0	possibly damaging	possibly damaging	-1.0
rs16827493	snp	NON_SYNONYMOUS_CODING	1	C/G	1133	1133	1	,Superfamily,;IPR010219,Tigrfam,NADH_DH_1_dsu;	161179704	161179704	TGCATGCTGCTTATATCCGG	CAGGAGGAGTGCACCAGGTG	P/A	229	229	KMFEFYERVSGARMHAAYIR	GGVHQDLPLGLMDDIYQFSK	NDUFS2	O75306	NA	NA	0	probably damaging	probably damaging	-1.0
rs513964	snp	NON_SYNONYMOUS_CODING	1	T/C	823	823	1	IPR001818,Pfam,Pept_M10_metallopeptidase;,Superfamily,;IPR006026,Smart,Peptidase_Metallo;IPR021190,Prints,Pept_M10A_matrixin;	102666209	102666209	TGTTCAGCTAGCTCAGGATG	CATTGATGGCATCCAAGCCA	D/G	252	252	IGALMYPSYTFSGDVQLAQD	IDGIQAIYGRSQNPVQPIGP	MMP1	B4DN15	NA	NA	0	probably damaging	probably damaging	-1.0
rs1794108	snp	NON_SYNONYMOUS_CODING	1	G/A	686	686	-	-	248818	248818	CTTCACGCTGGGGCTAGCAG	ACTTCTCGGCGAGGGAGTTT	G/E	204	204	DIKDLPVSEQQERAFTLGLA	LLGEGVFNFGELLMHPVLES	PSMD13	Q9UNM6	NA	NA	0	possibly damaging	possibly damaging	-1.0
rs6413537	snp	NON_SYNONYMOUS_CODING	1	G/A	1286	1286	1	,Seg,;IPR000586,Prints,Somatstn_rcpt;IPR000276,Pfam,7TM_GPCR_Rhodpsn;,Superfamily,;	37603091	37603091	GTGCCAGCGGCGGCGGCGCT	CGAACGCAGGGTCACGCGCA	S/F	251	251	VKVRSAGRRVWAPSCQRRRR	ERRVTRMVVAVVALFVLCWM	SSTR3	P32745	NA	NA	0	probably damaging	probably damaging	-1.0
rs3810449	snp	NON_SYNONYMOUS_CODING	1	C/T	610	610	1	IPR006612,Pfam,Znf_C2CH;IPR006612,pfscan,Znf_C2CH;	36530913	36530913	ACCCTCCTGCTTCCAGTGGC	CTGGGGTGTGCGCTACCTGC	R/H	70	70	VPSCHQHLCSEHFTPSCFQW	WGVRYLRPDAVPSIFSRGPP	THAP8	Q8NA92	0.05	NA	0	possibly damaging	probably damaging	-0.69
rs11586699	snp	NON_SYNONYMOUS_CODING	1	C/T	436	436	1	,pfscan,;IPR002049,pfscan,EGF_laminin;IPR002049,scanprosite,EGF_laminin;IPR006210,Smart,EGF-like;IPR002049,Pfam,EGF_laminin;	183184690	183184690	GCCAGGCTTCCACATGCTCA	GGATGCGGGGTGCACCCAAG	T/M	124	124	CKPGVTGARCDRCLPGFHML	DAGCTQDQRLLDSKCDCDPA	LAMC2	Q13753	0.1	NA	0	possibly damaging	possibly damaging	-1.0
rs3917996	snp	NON_SYNONYMOUS_CODING	1	A/G	2232	2232	1	IPR003961,Pfam,FN_III;IPR003961,pfscan,FN_III;	36933715	36933715	GGAAGAGCCCCCTTACCCAC	ACACCATCTTCTGGACCAAC	Y/H	562	562	WAQLEWVPEPPELGKSPLTH	TIFWTNAQNQSFSAILNASS	CSF3R	Q99062	NA	NA	0	probably damaging	probably damaging	-1.0
rs9332971	snp	NON_SYNONYMOUS_CODING	1	G/A	3091	3091	1	IPR000536,Smart,Nucl_hrmn_rcpt_lig-bd_core;IPR000536,Pfam,Nucl_hrmn_rcpt_lig-bd_core;	66942786	66942786	TCCCACATCCTGCTCAAGAC	CTTCTACCAGCTCACCAAGC	R/H	856	856	IKELDRIIACKRKNPTSCSR	FYQLTKLLDSVQPIARELHQ	AR	P10275	NA	NA	0	benign,probably damaging	possibly damaging	-1.0
rs4482466	snp	NON_SYNONYMOUS_CODING	1	A/G	335	335	1	IPR018248,Pfam,EF-hand;IPR002048,Smart,EF_hand_Ca-bd;	68415720	68415720	GTTCATGTCTCTGCCTGAGT	ACAACAGAATCCTTTAGTAC	L/S	39	39	KLDLDNSGSLSVEEFMSLPE	QQNPLVQRVIDIFDTDGNGE	PPP3R1	P63098	NA	NA	0	probably damaging	probably damaging	-1.0
rs12459404	snp	NON_SYNONYMOUS_CODING	1	G/A	208	208	1	IPR005571,Pfam,RNA_pol_Rpb5_N;IPR005571,Superfamily,RNA_pol_Rpb5_N;	1094004	1094004	GGAGGAGTTCAAAGCCCAAT	TGGGGACAAGCCGAGTGAGG	S/F	44	44	RGYLVTQDELDQTLEEFKAQ	GDKPSEGRPRRTDLTVLVAH	POLR2E	P19388	NA	NA	0	probably damaging	probably damaging	-1.0
rs751141	snp	NON_SYNONYMOUS_CODING	1	G/A	960	960	1	,Prints,;,Superfamily,;IPR000073,Pfam,AB_hydrolase_1;	27373865	27373865	TCTGGCCCAGGCAGGTTACC	GGTCCTAGCTATGGACATGA	R/Q	287	287	FPESWYSWRYQIPALAQAGY	VLAMDMKGYGESSAPPEIEE	EPHX2	9808	0.1	rs7357432	0	possibly damaging	probably damaging	-1.0
rs2020873	snp	NON_SYNONYMOUS_CODING	1	C/T	2368	2368	-	-	37092025	37092025	CCTGGAAGTGGACTGTGGAA	ACATTGTCTATAAAGCCTTG	H/Y	718	718	SGQQSEVPGSIPNSWKWTVE	IVYKALRSHILPPKHFTEDG	MLH1	Q5GJ64	NA	NA	0	probably damaging	probably damaging	-0.85
rs1041967	snp	NON_SYNONYMOUS_CODING	1	A/C	467	467	1	IPR000980,Smart,SH2;IPR000980,pfscan,SH2;	1340365	1340365	ATTCTACAAAATACACTATT	GGACACTACAACGTTGATAG	L/W	109	109	IGDQEFDSLPALLEFYKIHY	DTTTLIEPVSRSRQGSGVIL	CRK	P46108	NA	NA	0.02	probably damaging	probably damaging	-1.0
rs2066828	snp	NON_SYNONYMOUS_CODING	1	C/T	420	420	-	-	12870816	12870816	ACGGGAGCCCTAGCCTGGAG	GGATGGACGCCAGGCAGGCG	R/W	15	15	LRRRQT	MDARQAEHPKPSACRNLFGP	CDKN1B	Q6I9V6	NA	NA	0	probably damaging	probably damaging	-1.0
rs5914	snp	NON_SYNONYMOUS_CODING	1	A/T	2934	2934	1	-	42452068	42452068	TCAACGTGTCCTCCCTCCCC	ATGCGGTGCCCCCGCTCAGC	Y/N	968	968	RPLDQFVLQSHAWFNVSSLP	AVPPLSLPRGEAQVWTQLLR	ITGA2B	P08514	NA	NA	0.01	probably damaging	probably damaging	-1.0
rs2301620	snp	NON_SYNONYMOUS_CODING	1	G/A	11230	11230	1	-	20959918	20959918	GAGTGACTGATGACAAAGAC	GGCGTCTCCTGCTGTCACTT	R/W	3744	3744	ALTYLTGECNYGGRVTDDKD	RLLLSLLSMFYCKEIEEDYY	DNAH3	Q8TD57	0.03	NA	0	probably damaging	probably damaging	-1.0
rs12924551	snp	NON_SYNONYMOUS_CODING	1	G/A	10933	10933	1	-	20966273	20966273	GGCTCCGGGCCAACCTGTTG	GCTCCTACCTCAATGACCCC	R/C	3645	3645	LQNGIKMTNEPPKGLRANLL	SYLNDPISDPVFFQSCAKAV	DNAH3	Q8TD57	0.06	rs2073949,rs2106449,rs3743696,rs3743697	0	probably damaging	probably damaging	-0.67
rs13332291	snp	NON_SYNONYMOUS_CODING	1	G/A	5255	5255	1	,Superfamily,;	21042551	21042551	CATCAACCCCAAGGCTATCA	GATGGGGCAGCTGTATGGGT	T/M	1752	1752	AANQMEEFAVEYKIINPKAI	MGQLYGCFDQVSHEWMDGVL	DNAH3	Q8TD57	NA	NA	0	possibly damaging	probably damaging	-1.0
rs11541931	snp	NON_SYNONYMOUS_CODING	1	T/A	495	495	1	IPR005294,Tigrfam,ATPase_F1-cplx_asu;IPR004100,Pfam,ATPase_F1/V1/A1-cplx_a/bsu_N;	43669899	43669899	TGTTTGGAAATGATAAACTA	TTAAGGAAGGAGATATAGTG	I/F	125	125	MSLNLEPDNVGVVVFGNDKL	KEGDIVKRTGAIVDVPVGEE	ATP5A1	P25705	NA	NA	0	probably damaging	possibly damaging	-0.59
rs17886090	snp	5PRIME_UTR	1	A/G	110	110	-	-	29138301	29138301	ACCAGTCCATAAGGCTGAAG	AGTCTCGAGTGGGGTCAGGT	-	-	-	-	-	CHEK2	O96017	NA	NA	0	probably damaging	probably damaging	-1.0
rs17217772	snp	NON_SYNONYMOUS_CODING	1	A/G	603	603	1	IPR011184,PIRSF,DNA_mismatch_repair_MSH2;	47637246	47637246	TACTTAGGCTTCTCCTGGCA	TCTCTCTCAGTTTGAAGACA	N/S	127	127	AGNKASKENDWYLAYKASPG	LSQFEDILFGNNDMSASIGV	MSH2	P43246	NA	NA	0	probably damaging	possibly damaging	-0.66
rs1800152	snp	NON_SYNONYMOUS_CODING	1	T/G	2140	2140	1	IPR011184,PIRSF,DNA_mismatch_repair_MSH2;IPR000432,Pfam,DNA_mismatch_repair_MutS_C;IPR007696,Smart,DNA_mismatch_repair_MutS_core;	47702321	47702321	ATATTAAAAGCATCCAGGCA	GCTTGTGTTGAAGTTCAAGA	H/Q	639	639	YVRPAILEKGQGRIILKASR	ACVEVQDEIAFIPNDVYFEK	MSH2	P43246	NA	NA	0	probably damaging	probably damaging	-0.66
rs28925904	snp	NON_SYNONYMOUS_CODING	1	C/T	1359	1359	-	-	144359490	144359490	TATTAGTTATGACATTCCTC	AACACCTGGTAATACTTATC	P/L	311	311	SGTSSVETQMRHVSISYDIP	TPGNTYQIPRTFPEGTLGQT	GAB1	Q13480	0.03	NA	0.01	probably damaging	probably damaging	-0.67
rs2229100	snp	NON_SYNONYMOUS_CODING	1	C/T	4263	4263	1	-	20850434	20850434	GCACACTGGAGAAGGAGCAC	GGCCTGATGTCCTTCCCCAG	G/R	1408	1408	LPATVPLLLQHILSTLEKEH	PDVLPQALTALEVTRSGLTV	TEP1	Q99973	NA	NA	0	possibly damaging	probably damaging	-0.16
rs1801689	snp	NON_SYNONYMOUS_CODING	1	A/C	1032	1032	1	IPR016060,Superfamily,Complement_control_module;	64210580	64210580	GCACTATCGAAGTCCCCAAA	GCTTCAAGGGTAAGTCTGCA	C/G	325	325	KKCSYTEDAQCIDGTIEVPK	FKEHSSLAFWKTDASDVKPC	APOH	P02749	0.03	NA	0	probably damaging	probably damaging	-1.0
rs3735471	snp	3PRIME_UTR	1	C/T	1596	1596	-	-	42949706	42949706	TGTATCTGCCCTCAGCTATG	AGGCTGCCACTTTATTTTCA	-	-	-	-	-	PSMA2	P25787	NA	NA	0	probably damaging	probably damaging	-1.0
rs1627354	snp	NON_SYNONYMOUS_CODING	1	G/A	4608	4608	-	-	107677984	107677984	CGAATGGTGTGCTTGACATT	ACCTACCAATTCCATCCCAA	H/Y	1510	1510	LEENVPPEDIEKVANGVLDI	LPIPSQNLTDELVKIQKHMQ	LAMB4	A4D0S4	0.06	rs1636957,rs1636958	0.03	possibly damaging	possibly damaging	-0.14
rs918530	snp	NON_SYNONYMOUS_CODING	1	G/T	587	587	-	-	162869068	162869068	TAGCCTTCTGTGTTGGCATT	TCTATCATTGCATTAGAGAT	L/F	71	71	QLKACHCRIIFSKAKPSVLA	SIIALEIQAQKCVELTEGIE	CCNG1	P51959	0.01	NA	0	possibly damaging	possibly damaging	-1.0
rs11554564	snp	NON_SYNONYMOUS_CODING	1	C/A	4715	4715	1	,Superfamily,;IPR002999,Smart,Tudor;	43712707	43712707	CTCCAGGAAATAGCTTTGTA	GGCTCCGTGTTGTAGCCAAG	G/W	1488	1488	QAAAGPSDGLDASSPGNSFV	LRVVAKWSSNGYFYSGKITR	TP53BP1	Q12888	NA	NA	0	probably damaging	probably damaging	-1.0
rs28903076	snp	NON_SYNONYMOUS_CODING	1	G/A	4193	4193	1	-	43714198	43714198	CCAAGGCATCCAGCTTACAC	GCACATCAAGTGGGACAAGT	R/C	1314	1314	GSSGDLGDISSFSSKASSLH	TSSGTSLSAMHSSGSSGKGA	TP53BP1	Q12888	0.01	NA	0	probably damaging	probably damaging	-1.0
rs2256238	snp	NON_SYNONYMOUS_CODING	1	G/A	2979	2979	-	-	43739659	43739659	CCCATTTCATTTCACTTTGC	TAAAGAAGGTGATATCATCC	P/L	909	909	AHASQSFCESSSETPFHFTL	KEGDIIPPLTGATPPLIGHL	TP53BP1	Q12888	0.0	NA	0	probably damaging	probably damaging	-1.0
rs4865757	snp	NON_SYNONYMOUS_CODING	1	T/G	1992	1992	1	,Superfamily,;	52361713	52361713	CCTTTAGGAGCCATCTCCAG	ACTTTGGGAGGTCCTTGGAT	Y/D	617	617	RTKYSQKILGSDGAFRSHLQ	FGRSLDGYGDLNGDSITDVS	ITGA2	P17301	NA	NA	0.01	probably damaging	probably damaging	-1.0
rs235768	snp	NON_SYNONYMOUS_CODING	1	A/T	1789	1789	1	-	6759115	6759115	TCGAAATTCCCCGTGACCAG	CTTTTGGACACCAGGTTGGT	R/S	190	190	RINIYEIIKPATANSKFPVT	LLDTRLVNQNASRWESFDVT	BMP2	C8C060	NA	NA	0	possibly damaging	probably damaging	-0.43
rs2228262	snp	NON_SYNONYMOUS_CODING	1	A/G	2431	2431	1	-	39882178	39882178	AGACCTGGATGGCTGGCCCA	TGAGAACCTGGTGTGCGTGG	N/S	700	700	PGYAGNGIICGEDTDLDGWP	ENLVCVANATYHCKKDNCPN	THBS1	P07996	0.1	NA	0.01	possibly damaging	possibly damaging	-0.36
rs1803317	snp	NON_SYNONYMOUS_CODING	1	C/T	567	567	1	IPR003204,Superfamily,Cyt_c_oxidase_su5A;	75216038	75216038	ACCAACTTTAAATGAACTGG	AATCTCCACTCCGGAGGAAC	G/E	138	138	PHKEIYPYVIQELRPTLNEL	ISTPEELGLDKV	COX5A	P20674	NA	NA	0	probably damaging	possibly damaging	-1.0
rs16859180	snp	NON_SYNONYMOUS_CODING	1	C/T	1708	1708	-	-	219553468	219553468	CCCACATCCTGCCTGCATTC	GGGTCCTGAGCAGTCTTCTC	R/W	477	477	AGGQILKGILEGASHILPAF	VLSSLLSSCSDSVALYSFCR	STK36	Q9NRP7	0.04	rs12993599	0	probably damaging	probably damaging	-0.89
rs11544633	snp	NON_SYNONYMOUS_CODING	1	T/C	815	815	1	IPR003573,PIRSF,IL6_MGF_GCSF;IPR009079,Superfamily,4_helix_cytokine-like_core;IPR003573,Prints,IL6_MGF_GCSF;IPR003573,Pfam,IL6_MGF_GCSF;	22769164	22769164	GGTGAAAATCATCACTGGTC	TTTGGAGTTTGAGGTATACC	L/P	119	119	DGCFQSGFNEETCLVKIITG	LEFEVYLEYLQNRFESSEEQ	IL6	P05231	NA	NA	0	probably damaging	probably damaging	-1.0
rs1801122	snp	NON_SYNONYMOUS_CODING	1	C/A	2029	2029	1	,pfscan,;	37333657	37333657	CGCCCCACAGCCGCTCCCTA	CTGACATCCTGGGCCAGCCG	P/T	603	603	QASSFDFNGPYLGPPHSRSL	DILGQPEPPQEGGSQKSPPP	CSF2RB	P32927	NA	NA	0.01	probably damaging	probably damaging	-1.0
rs17750870	snp	NON_SYNONYMOUS_CODING	1	C/G	4368	4368	-	-	60904046	60904046	CTCCCTCTTCTATAACAACG	AGCCCGTCCATGTGGCTGCC	G/A	1434	1434	SSSSLFCRNAAASLSLFYNN	ARPCGCHEVGATGPTCEPFG	LAMA5	O15230	NA	NA	0	possibly damaging	probably damaging	-0.68
rs4275364	snp	NON_SYNONYMOUS_CODING	1	T/G	403	403	1	IPR020635,Smart,Tyr_Pkinase_cat_dom;IPR000215,scanprosite,Protease_inhib_I4_serpin;IPR016239,PIRSF,Ribosomal_S6_kinase_II;IPR011009,Superfamily,Kinase-like_dom;IPR000719,pfscan,Prot_kinase_cat_dom;IPR002290,Smart,Ser/Thr_prot_kinase_dom;IPR017442,Pfam,Se/Thr_prot_kinase-like_dom;	83402012	83402012	TATACTGGTGGAAGTAAATC	TCCATTTATTGTCAAATTGC	H/P	132	132	LKVRDRVRTKMERDILVEVN	PFIVKLHYAFQTEGKLYLIL	RPS6KA6	Q9UK32	NA	NA	0	probably damaging	probably damaging	-0.17
rs17202961	snp	NON_SYNONYMOUS_CODING	1	C/A	3708	3708	-	-	21424991	21424991	AGGTCCGTGTTCTAGTGGTG	CTGCAGAAAACTATGACTAC	P/T	1208	1208	AATVKVPEGKSLVLVRVLVV	AENYDYQILHKKSMDKSLEF	LAMA3	B0YJ33	0.07	NA	0	probably damaging	probably damaging	-1.0
rs1046714	snp	NON_SYNONYMOUS_CODING	1	G/T	1562	1562	1	IPR011009,Superfamily,Kinase-like_dom;IPR020635,Smart,Tyr_Pkinase_cat_dom;IPR001245,Pfam,Ser-Thr/Tyr-Pkinase;IPR017442,Pfam,Se/Thr_prot_kinase-like_dom;IPR000719,pfscan,Prot_kinase_cat_dom;	196547328	196547328	CATACTGGATGGCACCAGAG	TGGTTACACGGAAAGCTTAT	V/L	414	414	TPEQSKRSTMVGTPYWMAPE	VTRKAYGPKVDIWSLGIMAI	PAK2	Q13177	NA	NA	0.01	possibly damaging	possibly damaging	-1.0
rs3092895	-	NON_SYNONYMOUS_CODING	1	A/T	1845	1845	1	IPR011028,Superfamily,Cyclin-like;	49027140	49027140	TTCATATAGGATTCACCTTT	TTTGATCTTATTAAACAATC	L/F	569	569	HLERCEHRIMESLAWLSDSP	FDLIKQSKDREGPTDHLESA	RB1	P06400	NA	NA	0.01	possibly damaging	possibly damaging	-0.17
rs3092903	-	NON_SYNONYMOUS_CODING	1	C/G	2229	2229	1	IPR006670,Smart,Cyclin;IPR011028,Superfamily,Cyclin-like;	49033954	49033954	GAGTATGAACTCATGAGAGA	AGGCATTTGGACCAAGTAAG	D/E	697	697	EHIIWTLFQHTLQNEYELMR	RHLDQIMMCSMYGICKVKNI	RB1	P06400	NA	NA	0.03	possibly damaging	possibly damaging	-1.0
rs1048201	snp	3PRIME_UTR	1	C/T	1692	1692	-	-	123814308	123814308	CAGGATTTGTGTGCTGTTGC	GAATACTCAGGACGGACCTG	-	-	-	-	-	FGF2	P09038	0.21	NA	0.01	possibly damaging	probably damaging	-1.0
rs3738888	snp	NON_SYNONYMOUS_CODING	1	G/A	2107	2107	1	-	215595164	215595164	ATGAAATTCCTGAAGGTCCA	GCAGAAGCAGGCTCAACAGA	R/C	658	658	ACLRRKVCEQEEKYEIPEGP	RSRLNREQLLPKLFDGCYFY	BARD1	Q99728	0.02	NA	0.03	possibly damaging	possibly damaging	-1.0
rs3738885	snp	NON_SYNONYMOUS_CODING	1	G/C	857	857	-	-	215645876	215645876	ATCTAAGCAAAAGCTGGTAT	CTTCTGTAGCCAACCATCTG	S/C	241	241	EAEKEDGEFDSKEESKQKLV	FCSQPSVISSPQINGEIDLL	BARD1	Q99728	NA	NA	0.02	possibly damaging	possibly damaging	-0.73
rs2229198	snp	NON_SYNONYMOUS_CODING	1	C/T	1092	1092	1	IPR007080,Pfam,RNA_pol_Rpb1_1;IPR006592,Smart,RNA_pol_N;	7400729	7400729	AGATCAACAATCAGCTGCGG	GCAATGAGCAGAACGGCGCA	R/C	292	292	NQDDLTHKLADIVKINNQLR	NEQNGAAAHVIAEDVKLLQF	POLR2A	P24928	NA	NA	0	probably damaging	probably damaging	-1.0
rs2307361	snp	NON_SYNONYMOUS_CODING	1	A/T	567	567	-	-	201814288	201814288	TAGAAAACACTCTGAAAAGA	GGCTAAATTAGGTATGTTGC	M/K	106	106	SATGGGNKVYSFQNRKHSEK	AKLASELAKTPQKSVSFSLK	ORC2L	Q13416	NA	NA	0	probably damaging	probably damaging	-1.0
rs11548056	snp	NON_SYNONYMOUS_CODING	1	T/C	674	674	1	IPR019829,scanprosite,Macrophage_inhib_fac_CS;,Superfamily,;	24237053	24237053	CCTGCACAGCATCGGCAAGA	CGGCGGCGCGCAGAACCGCT	I/T	68	68	MAFGGSSEPCALCSLHSIGK	GGAQNRSYSKLLCGLLAERL	MIF	P14174	NA	NA	0	probably damaging	probably damaging	-0.84
rs11539599	snp	NON_SYNONYMOUS_CODING	1	T/C	550	550	1	IPR001392,PIRSF,Clathrin_mu;	183896806	183896806	TGTCAACGCTGCCATGGTCT	CGAATTCCTCTATAAGATGT	F/S	79	79	KRSNIWLAAVTKQNVNAAMV	EFLYKMCDVMAAYFGKISEE	AP2M1	Q96CW1	NA	NA	0	probably damaging	probably damaging	-0.68
rs2230222	snp	NON_SYNONYMOUS_CODING	1	T/A	695	695	-	-	159636772	159636772	CGGGGGAATATTCCCAAAAG	TGGCTCTGGCGACAGTCATC	D/V	196	196	CVIAECGELKEGDDGGIFPK	GSGDSHPDFPEDADIDLKDV	PPID	Q08752	NA	NA	0.01	possibly damaging	probably damaging	-0.62
rs4545636	snp	NON_SYNONYMOUS_CODING	1	C/A	336	336	-	-	121785678	121785678	TCTCCTTTACACAGGGCCCA	ATATTACACTGTCAAAACTT	D/Y	72	72	VSLMERRRLNQLLLPLLQGP	ITLSKLYKLIEESCPQLANS	ANAPC5	Q9UJX4	0.01	NA	0	probably damaging	probably damaging	-1.0
rs1051616	snp	NON_SYNONYMOUS_CODING	1	C/A	910	910	1	-	2103397	2103397	ATCTGTTGCAGCCGGAGCGG	CGCTGGAGGCCCGGCACGCG	P/T	94	94	EEHAVEALWKAVADLLQPER	LEARHAVLALLKAIVQGQGE	TSC2	P49815	NA	NA	0.01	benign,possibly damaging	possibly damaging	-1.0
rs28934872	snp	NON_SYNONYMOUS_CODING	1	G/A	2462	2462	1	IPR003913,Prints,Tuberin;IPR018515,Pfam,Tuberin-type_domain;	2120572	2120572	GCCAATCGCGAGCAGCATCC	GCTGCAGGTATGGTGGCTGG	R/Q	611	611	VSHIQLHYKHSYTLPIASSI	LQAFDFLLLLRADSLHRLGL	TSC2	P49815	NA	NA	0	benign,probably damaging	possibly damaging	-1.0
rs17880039	snp	NON_SYNONYMOUS_CODING	1	A/G	809	809	1	IPR007268,Pfam,Rad9;	67163628	67163628	AAACTTGAATCTTAGCATTC	TTTTGATGCTCCAGGCAGGT	H/R	239	239	LKEFRGLLSFAESANLNLSI	FDAPGRPAIFTIKDSLLDGH	RAD9A	Q99638	NA	NA	0.02	probably damaging	probably damaging	-0.17
rs6413463	snp	NON_SYNONYMOUS_CODING	1	A/T	640	640	1	IPR020683,Superfamily,Ankyrin_rpt-contain_dom;	21970989	21970989	CTGGCTGAGGAGCTGGGCCA	CGCGATGTCGCACGGTACCT	H/Q	123	123	RLDVRDAWGRLPVDLAEELG	RDVARYLRAAAGGTRGSNHA	CDKN2A	Q8N726	NA	NA	0	probably damaging	probably damaging	-1.0
rs11552822	snp	NON_SYNONYMOUS_CODING	1	C/A	521	521	1	IPR020683,pfscan,Ankyrin_rpt-contain_dom;IPR020683,Superfamily,Ankyrin_rpt-contain_dom;	21971108	21971108	CTCTCACCCGACCCGTGCAC	ACGCTGCCCGGGAGGGCTTC	D/Y	84	84	LLHGAEPNCADPATLTRPVH	AAREGFLDTLVVLHRAGARL	CDKN2A	Q8N726	NA	NA	0	probably damaging,possibly damaging	probably damaging	-1.0
rs3087944	snp	NON_SYNONYMOUS_CODING	1	C/T	1330	1330	1	,Prints,;IPR011009,Superfamily,Kinase-like_dom;IPR020635,Smart,Tyr_Pkinase_cat_dom;IPR017442,Pfam,Se/Thr_prot_kinase-like_dom;IPR000719,pfscan,Prot_kinase_cat_dom;	30739323	30739323	GGAAGCAGGCGAGGGAGGGT	TGTTCTGGAGAAACTGGAGA	S/F	214	214	YGAVLWGETVHLFMEAGEGG	VLEKLESCGPMREFEIIWVT	MAP3K8	P41279	NA	NA	0	possibly damaging	possibly damaging	-1.0
rs5763269	snp	NON_SYNONYMOUS_CODING	1	C/T	1877	1877	1	IPR010790,Pfam,DUF1388;,pfscan,;	29885473	29885473	GAAGGAAGAAGCAAAGTCAC	GGCTGAGGCCAAGTCCCCAG	P/L	615	615	PAEAKSPEKAKSPVKEEAKS	AEAKSPVKEEAKSPAEVKSP	NEFH	P12036	NA	NA	0.01	probably damaging	probably damaging	-0.67
rs2230239	snp	NON_SYNONYMOUS_CODING	1	G/A	2430	2430	-	-	52129493	52129493	GCCTCACAGAATCCATCAAC	GGGACAGCGAAGAGCCCTTC	R/W	774	774	VFREAHAQSIGMNRLTESIN	DSEEPFSSVEIQAALSKMQD	MCM3	P25205	0.01	NA	0	possibly damaging	possibly damaging	-1.0
rs2307329	snp	NON_SYNONYMOUS_CODING	1	T/A	949	949	1	-	52143580	52143580	GCCCTCTTTCTCTGCTGAGG	TATAGCCAAGATCAAGAAGT	D/V	280	280	LIACNVKQMSKDAQPSFSAE	IAKIKKFSKTRSKDIFDQLA	MCM3	P25205	NA	NA	0	probably damaging	possibly damaging	-1.0
rs3730017	snp	NON_SYNONYMOUS_CODING	1	G/A	895	895	1	IPR004030,Pfam,NO_synthase_oxygenase_dom;IPR004030,Superfamily,NO_synthase_oxygenase_dom;	26109102	26109102	CCCGCAGCTGTTCCACTGCC	GGGAAATGTTTGAACACATC	R/W	221	221	IGRIQWSNLQVFDARSCSTA	EMFEHICRHVRYSTNNGNIR	NOS2	P35228	0.01	rs16966563	0.01	possibly damaging	possibly damaging	-0.6
rs11214077	snp	NON_SYNONYMOUS_CODING	1	A/G	159	159	1	-	111958677	111958677	GTGTGGAGTGCAGCACATAC	CTTGTCACCGAGCCACCATT	H/R	50	50	HISAFLQDRPIPEWCGVQHI	LSPSHHSGSKAASLHWTSER	SDHD	O14521	NA	NA	0	probably damaging	possibly damaging	-0.1
rs3027507	snp	NON_SYNONYMOUS_CODING	1	A/C	335	335	1	,Superfamily,;IPR003323,pfscan,OTU;	48792264	48792264	GGTGTATGGAGACCAGGACA	GCATGAGGTTGTGCGAAAGC	M/R	112	112	KEDGACLFRAVADQVYGDQD	HEVVRKHCMDYLMKNADYFS	OTUD5	Q96G74	NA	NA	0	probably damaging	probably damaging	-0.07
rs13447493	snp	NON_SYNONYMOUS_CODING	1	G/T	453	453	1	IPR011009,Superfamily,Kinase-like_dom;IPR017442,Pfam,Se/Thr_prot_kinase-like_dom;IPR020635,Smart,Tyr_Pkinase_cat_dom;IPR000719,pfscan,Prot_kinase_cat_dom;	91973953	91973953	TTCAGTGCCTAACAGTGGCT	GGTAGGCAATTTAAACATAT	G/W	112	112	LIPTSHPIRIAAELQCLTVA	GQDNVMGVKYCFRKNDHVVI	CDC7	O00311	NA	NA	0	probably damaging	probably damaging	-1.0
rs11574151	snp	REGULATORY_REGION	1	T/G	-	-	-	-	30889577	30889577	TGATTGGACCAGTCTGTCTA	CTACCGTTGTAGATGTTAGA	-	-	-	-	-	WRN	Q14191	NA	NA	0	possibly damaging	possibly damaging	-0.12
rs2307313	snp	NON_SYNONYMOUS_CODING	1	G/A	2423	2423	1	,Superfamily,;IPR001208,Pfam,DNA-dep_ATPase_MCM;	127338035	127338035	TGAAGAAGTACATCATCTAC	CCAAGGAGAGGGTCCACCCG	A/T	727	727	PNTYGVEPLPQEVLKKYIIY	KERVHPKLNQMDQDKVAKMY	MCM2	P49736	0.01	NA	0	possibly damaging	possibly damaging	-1.0
rs1804275	snp	NON_SYNONYMOUS_CODING	1	C/A	444	444	1	IPR016090,Superfamily,Phospholipase_A2;,Smart,;IPR001211,Prints,Phospholipase_A2_euk;	20304886	20304886	GTGGCAGAGGATCCCCCAAG	ATGCAACGGATCGGTGAGGC	D/Y	58	58	ALSYGFYGCHCGVGGRGSPK	ATDRCCVTHDCCYKRLEKRG	PLA2G2A	P14555	NA	NA	0	probably damaging	probably damaging	-1.0
rs547809	snp	NON_SYNONYMOUS_CODING	1	C/T	2524	2524	-	-	33369472	33369472	GACCAATCAGATAACTTTAT	TGCCCCTCAGCCAGTTAGTG	S/F	740	740	CSNHYNSVMPQPLLTNQITL	APQPVSVGIAHVVWPQPATT	HIPK3	Q9H422	0.0	NA	0.02	possibly damaging	possibly damaging	-0.7
rs4150521	snp	3PRIME_UTR	1	G/A	2372	2372	-	-	128016978	128016978	GGAGGAAGACTTGGCGTTTT	GACAAAAGAAGAGCAACAGC	-	-	-	-	-	ERCC3	P19447	0.0	NA	0.03	possibly damaging	possibly damaging	-0.23
rs11567997	snp	NON_SYNONYMOUS_CODING	1	C/G	1168	1168	1	IPR000751,Prints,MPI_Phosphatase;	137625228	137625228	GTGCGCTGCCAACCGTGTCA	GGAAACACCAAGATCTGAAG	G/R	297	297	SNQGHLIGDFSKVCALPTVS	KHQDLKYVNPETVAALLSGK	CDC25C	P30307	NA	NA	0	probably damaging	probably damaging	-1.0
rs1804298	snp	NON_SYNONYMOUS_CODING	1	A/G	377	377	1	IPR002132,Superfamily,Ribosomal_L5;IPR020928,Pfam,Ribosomal_L5_C;	24021217	24021217	CTTTGGTTTTGGGATCCAGG	ACACATCGATCTGGGTATCA	E/G	111	111	EYELRKNNFSDTGNFGFGIQ	HIDLGIKYDPSIGIYGLDFY	RPL11	10301	NA	NA	0	probably damaging	probably damaging	-1.0
rs20555	snp	NON_SYNONYMOUS_CODING	1	A/G	2266	2266	1	-	107601751	107601751	TGTCGTCCTTCCTCGGCCGG	GTGCTTTGAGAAGGGAACAA	V/A	694	694	DDNQVVSLSPGSRYVVLPRP	CFEKGTNYTVRLELPQYTSS	LAMB1	P07942	NA	NA	0	possibly damaging	possibly damaging	-1.0
rs4147793	snp	NON_SYNONYMOUS_CODING	1	T/C	511	511	1	-	179336257	179336257	ATGATAGTCCTGAAAAGATA	ATGAAAGAACAATGGCCGTC	Y/H	133	133	YKHPISRWIARNFYDSPEKI	ERTMAVLQIEAEKAELRVKE	NDUFB5	O43674	NA	NA	0	possibly damaging	possibly damaging	-0.53
rs2230094	snp	NON_SYNONYMOUS_CODING	1	C/T	431	431	-	-	68156193	68156193	TGACCTACAGATAAATGACC	AGAACGGGAATTTTTGGAAA	P/L	136	136	ISPNCHQELDAHEDDLQIND	EREFLERPSRDHLYLPLEPS	NFATC3	Q12968	NA	NA	0	probably damaging	probably damaging	-0.32
rs5030811	snp	NON_SYNONYMOUS_CODING	1	C/T	1183	1183	1	,Pfam,;	10188200	10188200	CTTTGCTTGTCCCGATAGGT	ACCTTTGGCTCTTCAGAGAT	H/Y	115	115	PQPYPTLPPGTGRRIHSYRG	LWLFRDAGTHDGLLVNQTEL	VHL	P40337	NA	NA	0	probably damaging	probably damaging	-1.0
rs3752579	snp	NON_SYNONYMOUS_CODING	1	A/T	1766	1766	1	IPR009254,Pfam,Laminin_I;,Superfamily,;	112493889	112493889	GTCAGATCTCCAGGAAGCAC	TGACCAGGCCCTTAACTATG	L/H	492	492	PVVLEQLDDYNAKLSDLQEA	DQALNYVRDAEDMNRATAAR	LAMA4	Q16363	NA	NA	0	probably damaging	possibly damaging	-1.0
rs11757455	snp	NON_SYNONYMOUS_CODING	1	G/A	751	751	1	IPR002049,Pfam,EGF_laminin;,pfscan,;,Superfamily,;	112522852	112522852	ATAGGAAAAATGGAGCTGTT	GGTGCATTTGTAACGAAAAT	R/W	154	154	CPLPHLANFAESCYRKNGAV	CICNENYAGPNCERCAPGYY	LAMA4	Q16363	0.03	NA	0	probably damaging	probably damaging	-0.52
rs1048714	snp	NON_SYNONYMOUS_CODING	1	G/T	572	572	1	-	100920987	100920987	GAAAATGGTGACTTCAACTG	ATTGTTCCAGGAAAATTTTT	W/C	183	183	ETFDVDEYEHYERVENGDFN	IVPGKFLAFSGPHPKSKIEN	CDC14A	Q9UNH5	NA	NA	0.01	probably damaging	probably damaging	-1.0
rs1043770	snp	NON_SYNONYMOUS_CODING	1	A/T	982	982	1	IPR011537,Tigrfam,NADH-UbQ_OxRdtase_suF;	67378594	67378594	ACTCAGGCACCAAACTATTC	ACATCTCTGGCCATGTCAAC	N/Y	277	277	RGGTWFAGFGRERNSGTKLF	ISGHVNHPCTVEEEMSVPLK	NDUFV1	P49821	NA	NA	0	possibly damaging	probably damaging	-0.21
rs17091204	snp	3PRIME_UTR	1	G/A	2991	2991	-	-	153589848	153589848	ATCCAAGATTGTGGGCCCCT	GGGTGCAGCGGTGCCCTGCA	-	-	-	-	-	FLNA	Q6NXF2	NA	NA	0	probably damaging	possibly damaging	-0.85
rs7110221	snp	NON_SYNONYMOUS_CODING	1	T/A	1009	1009	1	IPR002348,Prints,IL1_HBGF;IPR002348,Pfam,IL1_HBGF;IPR008996,Superfamily,Cytokine_IL1-like;	69625275	69625275	CTTCAAGACCCGCCGCACAC	GAAGTCCTCCCTGTTCCTGC	Q/L	173	173	WYVSVNGKGRPRRGFKTRRT	KSSLFLPRVLDHRDHEMVRQ	FGF3	P11487	NA	NA	0	probably damaging	probably damaging	-0.58
rs11465864	snp	NON_SYNONYMOUS_CODING	1	C/A	230	230	1	IPR011029,Superfamily,DEATH-like;	10219567	10219567	CCAGCTGCGGAAGATCAAGT	CATGGAGCGGGTGCAGGGTG	S/Y	47	47	DWMEFASYVITDLTQLRKIK	MERVQGVSITRELLWWWGMR	IRAK2	O43187	0.01	NA	0	possibly damaging	probably damaging	-0.72
rs11465930	snp	NON_SYNONYMOUS_CODING	1	G/C	1810	1810	-	-	10280678	10280678	TCATCGTGGGAAGGGAGGCT	ACTCCTCCTCTGAGGCCTGT	D/H	574	574	PLLPTENGEGRLRVIVGREA	SSSEACVGLEPPQDVTETSW	IRAK2	O43187	NA	NA	0	possibly damaging	possibly damaging	-1.0
rs11545623	snp	NON_SYNONYMOUS_CODING	1	C/A	940	940	1	IPR011545,Pfam,DNA/RNA_helicase_DEAD/DEAH_N;IPR014001,Smart,DEAD-like_N;,Superfamily,;	62499346	62499346	AGATAGAATGCTTGATATGG	CTTTGAACCCCAAATAAGGA	G/V	257	257	TNLRRTTYLVLDEADRMLDM	FEPQIRKIVDQIRPDRQTLM	DDX5	P17844	NA	NA	0	probably damaging	probably damaging	-1.0
rs3218684	snp	NON_SYNONYMOUS_CODING	1	C/T	518	518	-	-	108098563	108098563	AAACAATTAAACATCTAGAT	GGCATTCAGATTCCAAACAA	R/W	45	45	KEVEKFKRLIRDPETIKHLD	HSDSKQGKYLNWDAVFRFLQ	ATM	Q13315	0.01	rs2234998,rs2235002	0	possibly damaging	possibly damaging	-0.52
rs1800054	snp	NON_SYNONYMOUS_CODING	1	C/G	531	531	-	-	108098576	108098576	TCTAGATCGGCATTCAGATT	CAAACAAGGAAAATATTTGA	S/C	49	49	KFKRLIRDPETIKHLDRHSD	KQGKYLNWDAVFRFLQKYIQ	ATM	Q13315	NA	NA	0.01	possibly damaging	possibly damaging	-0.81
rs1800057	snp	NON_SYNONYMOUS_CODING	1	C/G	3546	3546	1	-	108143456	108143456	TCTTTTCCCGTAGGCTGATC	TTATTCAAAATGGGCCATTC	P/R	1054	1054	YIFSVRMALVNCLKTLLEAD	YSKWAILNVMGKDFPVNEVF	ATM	Q13315	NA	NA	0	probably damaging	probably damaging	-1.0
rs2066776	snp	NON_SYNONYMOUS_CODING	1	G/A	1047	1047	1	IPR020635,Smart,Tyr_Pkinase_cat_dom;IPR002290,Smart,Ser/Thr_prot_kinase_dom;IPR011009,Superfamily,Kinase-like_dom;IPR017442,Pfam,Se/Thr_prot_kinase-like_dom;IPR000719,pfscan,Prot_kinase_cat_dom;	50694084	50694084	GATCATGAAGGTGACGGGGA	GCCTCCGGCTGAGTTTGTGC	T/M	244	244	TLFKGSDHLDQLKEIMKVTG	PPAEFVQRLQSDEAKNYMKG	MAPK12	P53778	NA	NA	0	possibly damaging	possibly damaging	-0.41
rs9282655	snp	NON_SYNONYMOUS_CODING	1	T/C	2274	2274	1	IPR002126,pfscan,Cadherin;	68857448	68857448	GTGAAGGGGCCGCTGGCGTC	GTAGGAAGGCACAGCCTGTC	C/R	695	695	KDQVTTLEVSVCDCEGAAGV	RKAQPVEAGLQIPAILGILG	CDH1	P12830	NA	NA	0	probably damaging	probably damaging	-0.9
rs754093	snp	NON_SYNONYMOUS_CODING	1	T/G	2620	2620	1	,pfscan,;	77246406	77246406	TCGTGGCCGGCTTCCCGCCC	GTCCGCAGAGAAGCACCCTG	C/G	751	751	SQQLAMPPDPSSCLVAGFPP	PQRSTLMPAAPGVSPKLHDL	NFATC1	B5B2M8	0.45	NA	0.03	probably damaging	probably damaging	-0.24
rs4986949	snp	NON_SYNONYMOUS_CODING	1	G/T	688	688	1	IPR004046,Pfam,GST_C;	67353677	67353677	GCAAGACCTTCATTGTGGGA	ACCAGGTGAGCATCTGGCCC	D/Y	147	147	LKPFETLLSQNQGGKTFIVG	QISFADYNLLDLLLIHEVLA	GSTP1	P09211	NA	NA	0	probably damaging	probably damaging	-1.0
rs1141282	snp	NON_SYNONYMOUS_CODING	1	G/A	909	909	1	IPR006186,Smart,Ser/Thr-sp_prot-phosphatase;,Superfamily,;	75230840	75230840	CAATACAGTTCGAGGATGTT	TTATTTTTATAAGTAAGGAA	S/F	266	266	EDFGNEKSQEHFSHNTVRGC	YFYNYPAVCEFLQNNNLLSI	PPP3CB	Q8N1F0	0.0	rs11000670	0	probably damaging	possibly damaging	-1.0
rs3729778	snp	NON_SYNONYMOUS_CODING	1	A/C	1510	1510	1	IPR008973,Superfamily,C2_Ca/lipid-bd_dom_CaLB;	138426095	138426095	GTTGAATCCAATGGGAACTG	TCAAACAAATCCATATACTG	V/G	479	479	LHSWSSFPDELEEMLNPMGT	QTNPYTENATALHVKFPENK	PIK3CB	P42338	NA	NA	0	probably damaging	probably damaging	-0.36
rs5949	snp	NON_SYNONYMOUS_CODING	1	C/T	1131	1131	1	IPR009115,Prints,AnnexinVIII;	79522685	79522685	TAATTGTGTGAGGAACACGC	GGCCTTTTTAGCCGAAAGAC	P/L	251	251	ELSGHFEDLLLAIVNCVRNT	AFLAERLHRALKGIGTDEFT	ANXA3	P12429	0.0	NA	0.04	probably damaging	probably damaging	-0.18
rs12828557	snp	NON_SYNONYMOUS_CODING	1	T/A	1418	1418	1	,Superfamily,;IPR020422,Smart,Dual-sp_phosphatase_subgr_cat;IPR000340,Pfam,Dual-sp_phosphatase_cat-dom;IPR020422,pfscan,Dual-sp_phosphatase_subgr_cat;IPR000387,pfscan,Dual-sp/Tyr_phosphatase;IPR003595,Smart,Tyr_Pase_cat;	89743239	89743239	TTACCTTATGCAGAAGCTCA	TCTGTCGATGAACGACGCCT	N/I	313	313	CLAGISRSVTVTVAYLMQKL	LSMNDAYDIVKMKKSNISPN	DUSP6	Q16828	NA	NA	0	possibly damaging	possibly damaging	-0.97
rs28897673	snp	NON_SYNONYMOUS_CODING	1	T/C	433	433	1	-	41256266	41256266	TTTTACAGATGCAAACAGCT	TAATTTTGCAAAAAAGGAAA	Y/C	105	105	ELLKIICAFQLDTGLEYANS	NFAKKENNSPEHLKDEVSII	BRCA1	P38398	NA	NA	0.01	probably damaging,benign,possibly damaging	probably damaging	-1.0
rs28897672	snp	NON_SYNONYMOUS_CODING	1	A/G	300	300	1	IPR011364,PIRSF,BRCA1;IPR001841,pfscan,Znf_RING;IPR002378,Prints,Brst_cancerI;IPR018957,Pfam,Znf_C3HC4_RING-type;IPR004181,Pfam,Znf_MIZ;,Superfamily,;	41258504	41258504	AGAAGAAAGGGCCTTCACAG	GTCCTTTATGTAAGAATGAT	C/R	61	61	HIFCKFCMLKLLNQKKGPSQ	PLCKNDITKRSLQESTRFSQ	BRCA1	P38398	NA	NA	0	probably damaging	probably damaging	-1.0
rs10334	snp	NON_SYNONYMOUS_CODING	1	C/A	752	752	1	IPR000243,Prints,Pept_T1A_subB;,Superfamily,;	170844381	170844381	TGAGAGAGATGTGTACACTG	GGACGCACTCCGGATCTGCA	G/V	218	218	RAMRLVKDVFISAAERDVYT	DALRICIVTKEGIREETVSL	PSMB1	P20618	NA	NA	0	probably damaging	probably damaging	-1.0
rs11606329	snp	NON_SYNONYMOUS_CODING	1	A/G	729	729	1	IPR002909,Pfam,IPT_TIG_rcpt;IPR002909,Smart,IPT_TIG_rcpt;	65426264	65426264	ACACTGCCGAGCTCAAGATC	GCCGAGTGAACCGAAACTCT	C/R	197	197	PVLSHPIFDNRAPNTAELKI	RVNRNSGSCLGGDEIFLLCD	RELA	Q04206	NA	NA	0.01	probably damaging	probably damaging	-1.0
rs1045051	snp	NON_SYNONYMOUS_CODING	1	T/G	2117	2117	1	IPR018324,Tigrfam,Checkpoint_prot_Rad24_fun/met;,Pfam,;	68695940	68695940	CTGCCTACCAGCTTTATGCC	CCAAACTCAGCTATTGCCAT	L/R	546	546	RENCLAAKALFPDFCLPALC	QTQLLPYLALLTIPMRNQAQ	RAD17	O75943	NA	NA	0	possibly damaging,benign	probably damaging	-1.0
rs16867223	snp	NON_SYNONYMOUS_CODING	1	G/A	1063	1063	-	-	10045055	10045055	AACATTTTTAGATTTGCCTC	TTTTCCAGACATAACTGAAG	R/H	292	292	PDYEDIYKKTVEVGTFLDLP	FPDITEDCYLHPNILCMKYL	TAF1B	Q53T94	NA	NA	0.03	possibly damaging	possibly damaging	-1.0
rs11248415	snp	NON_SYNONYMOUS_CODING	1	T/G	425	425	1	IPR011046,Superfamily,WD40_repeat-like_dom;	124915194	124915194	GATCCAACGCATGCCTGGAG	GGAGGACTAGATCATCAATT	S/R	72	72	KYQHTGAVLDCAFYDPTHAW	GGLDHQLKMHDLNTDQENLV	BUB3	O43684	NA	NA	0	probably damaging,possibly damaging	probably damaging	-1.0
rs11252089	snp	NON_SYNONYMOUS_CODING	1	G/A	686	686	1	,pfscan,;	3824084	3824084	CAGCTCGGGAAAATTGAGCT	CTCTGTCACCTCCACGCCTC	S/F	142	142	TAKFTSDPIGEVLVSSGKLS	SVTSTPPSSPELSREPSQLW	KLF6	Q99612	NA	NA	0	probably damaging	possibly damaging	-0.51
rs6919807	snp	NON_SYNONYMOUS_CODING	1	G/A	470	470	1	-	39832264	39832264	GCCTGACTATTACATCGACC	CATCAATTCCATGGCTGCGG	R/H	105	105	KKEQEDPNKLATSWPDYYID	INSMAAMQSLYAFDEEETEM	DAAM2	Q86T65	NA	NA	0	possibly damaging	possibly damaging	-1.0
rs4135013	snp	NON_SYNONYMOUS_CODING	1	C/T	1367	1367	1	IPR003593,Smart,ATPase_AAA+_core;IPR014001,Smart,DEAD-like_N;,Superfamily,;IPR003959,Pfam,ATPase_AAA_core;	38450261	38450261	AGGCCAGGATGTATTGTACA	GCTATTTGAATGGCCATGGC	T/M	299	299	IVLVLDEMDQLDSKGQDVLY	LFEWPWLSNSHLVLIGIANT	CDC6	Q99741	0.0	NA	0	probably damaging	probably damaging	-1.0
rs1801118	snp	NON_SYNONYMOUS_CODING	1	A/G	1647	1647	1	IPR002404,pfscan,Insln_rcpt_S1;IPR002404,Pfam,Insln_rcpt_S1;,Superfamily,;	227662829	227662829	GGCCGTGGTGCTGCAGCTGA	GAACATCAGGCGCTGTGGCC	M/T	209	209	SKTISFVKLNSEAAAVVLQL	NIRRCGHSENFFFIEVGRSA	IRS1	P35568	NA	NA	0	probably damaging	possibly damaging	-1.0
rs11656816	snp	NON_SYNONYMOUS_CODING	1	C/A	2120	2120	1	IPR001241,Smart,Topo_IIA_B/N;	38561128	38561128	CTTTAATTTATAGGCCTTTA	CAAAAAACAGATAGATGATC	S/I	654	654	HRIQFKYSGPEDDAAISLAF	KKQIDDRKEWLTNFMEDRRQ	TOP2A	P11388	NA	NA	0	probably damaging	probably damaging	-1.0
rs2308957	snp	NON_SYNONYMOUS_CODING	1	C/T	1761	1761	1	IPR003021,Pfam,Rad1_Rec1;IPR003021,Prints,Rad1_Rec1;	34911884	34911884	ACTTCGAATGTGTTACCAAG	TTATGGTTACCCTTTGATGC	G/D	114	114	SIFGSSPMPGTLTALRMCYQ	YGYPLMLFLEEGGVVTVCKI	RAD1	O60671	NA	NA	0.01	probably damaging	possibly damaging	-0.92
rs17209274	snp	NON_SYNONYMOUS_CODING	1	T/G	1323	1323	1	-	19496064	19496064	CCATGACAGGATGAAGGACA	GCGCGTGCAGACTTTCAGCA	M/R	356	356	LKENLREMIEESANKFGMKD	RVQTFSIHFGFKHKFLASDV	CDC45L	O75419	NA	NA	0	probably damaging	probably damaging	-0.65
rs1804650	snp	NON_SYNONYMOUS_CODING	1	G/A	592	592	1	IPR011029,Superfamily,DEATH-like;IPR001875,Smart,DED;IPR001875,pfscan,DED;	202050657	202050657	TGGTCCCCAACAAGAAGCTG	AGAAGTCCAGCTCAGCCTCA	E/K	53	53	VQDVENLKFLCIGLVPNKKL	KSSSASDVFEHLLAEDLLSE	CASP10	Q92851	NA	NA	0.03	possibly damaging,probably damaging	possibly damaging	-1.0
rs11557652	snp	NON_SYNONYMOUS_CODING	1	A/T	857	857	1	IPR002423,Superfamily,Cpn60/TCP-1;IPR012718,Tigrfam,Chap_CCT_epsi;	10256172	10256172	GGCTGCTCGTGTTGCTATTG	ACACCTGGACAAGATCAGCG	E/V	146	146	RGIHPIRIADGYEQAARVAI	HLDKISDSVLVDIKDTEPLI	CCT5	P48643	NA	NA	0.03	possibly damaging	probably damaging	-0.81
rs28989182	snp	NON_SYNONYMOUS_CODING	1	G/A	2636	2636	1	IPR002290,Smart,Ser/Thr_prot_kinase_dom;	40504755	40504755	CAACCTCAAGTTAAAGGAAC	TTTAAATGAAGATTTTGATC	R/H	814	814	IKVSSQPVPWDFYINLKLKE	LNEDFDHFCSCYQYQDGCIV	BUB1B	O60566	NA	NA	0	possibly damaging	possibly damaging	-1.0
rs28989184	snp	NON_SYNONYMOUS_CODING	1	T/C	2921	2921	1	IPR002290,Smart,Ser/Thr_prot_kinase_dom;	40509744	40509744	GAACAATCAAGCTTTGAAGA	AGTGGACTTTTCCTACAGTG	I/T	909	909	ILRNRIHDPYDCNKNNQALK	VDFSYSVDLRVQLDVFTLSG	BUB1B	O60566	NA	NA	0.01	possibly damaging	possibly damaging	-1.0
rs28989185	snp	NON_SYNONYMOUS_CODING	1	T/C	3230	3230	1	-	40512842	40512842	TGAGGCCACAGTGTCTGTTC	TGGGGAGCTTGCAGCAGAAA	L/P	1012	1012	LWNKFFVRILNANDEATVSV	GELAAEMNGVFDTTFQSHLN	BUB1B	O60566	NA	NA	0	probably damaging	probably damaging	-1.0
rs11954456	snp	NON_SYNONYMOUS_CODING	1	C/G	1070	1070	1	IPR003598,Smart,Ig_sub2;IPR003599,Smart,Ig_sub;IPR016248,PIRSF,Tyr_kinase_fibroblast_GF_rcpt;IPR013151,Pfam,Immunoglobulin;IPR003596,Smart,Ig_V-set_sub;IPR007110,pfscan,Ig-like;IPR013106,Pfam,Ig_V-set;,Superfamily,;IPR009134,Prints,Tyr_prot_kinase_VEGFR_rcpt_N;	176519419	176519419	CTGCTGTGCAAGGTGTACAG	GATGCCCAGCCCCACATCCA	S/R	275	275	LPANTTAVVGSDVELLCKVY	DAQPHIQWLKHIVINGSSFG	FGFR4	P22455	NA	NA	0	probably damaging	probably damaging	-1.0
rs351855	snp	NON_SYNONYMOUS_CODING	1	G/A	1407	1407	1	,Seg,;	176520243	176520243	CTGTGCTCCTGCTGCTGGCC	GGCTGTATCGAGGGCAGGCG	G/R	388	388	TDIILYASGSLALAVLLLLA	LYRGQALHGRHPRPPATVQK	FGFR4	P22455	NA	NA	0.02	possibly damaging	possibly damaging	-0.16
rs11549696	snp	NON_SYNONYMOUS_CODING	1	G/T	467	467	1	IPR013799,Superfamily,STAT_TF_prot_interaction;	191874651	191874651	AGCTTTATGATGACAGTTTT	CCATGGAAATCAGACAGTAC	P/T	27	27	LQQLDSKFLEQVHQLYDDSF	MEIRQYLAQWLEKQDWEHAA	STAT1	P42224	NA	NA	0	probably damaging	probably damaging	-1.0
rs11558237	snp	NON_SYNONYMOUS_CODING	1	A/G	700	700	1	IPR006186,Smart,Ser/Thr-sp_prot-phosphatase;IPR004843,Pfam,M-pesterase;	111162533	111162533	CATTAAACTATGGAAAACTT	CACAGACTGTTTTAACTGTT	F/S	152	152	RIYGFYDECKRRYNIKLWKT	TDCFNCLPIAAIVDEKIFCC	PPP1CC	P36873	NA	NA	0	probably damaging	probably damaging	-1.0
rs1048221	snp	NON_SYNONYMOUS_CODING	1	C/A	1048	1048	1	,Superfamily,;	27679732	27679732	AAACATGTCCATGAGGGTCC	GCGCCACTCTGACCCTGCCC	R/L	135	135	LFLLEEYKNYLDAANMSMRV	RHSDPARRGELSVCDSISEW	BDNF	P23560	NA	NA	0	probably damaging	probably damaging	-1.0
rs25474	snp	NON_SYNONYMOUS_CODING	1	G/A	1661	1661	-	-	44050050	44050050	GGAGGAGAATGGGGAAGACC	GTATGCAGGCTCCACGGATG	P/L	514	514	RVAEQKEHRLPPGQEENGED	YAGSTDENTDSEEHQEPPDL	XRCC1	Q6IBS4	0.0	NA	0	probably damaging	probably damaging	-0.91
rs2307184	snp	NON_SYNONYMOUS_CODING	1	G/T	1574	1574	-	-	44050231	44050231	GGACAATGGGGCGGAAGATT	TGGGGACACAGAGGATGAGC	S/Y	485	485	QEDIDIEGVQSEGQDNGAED	GDTEDELRRVAEQKEHRLPP	XRCC1	Q6IBS4	0.01	NA	0	possibly damaging	possibly damaging	-1.0
rs1799782	snp	NON_SYNONYMOUS_CODING	1	G/A	700	700	-	-	44057574	44057574	CGGGGGCTCTCTTCTTCAGC	GGATCAACAAGACATCCCCA	R/W	194	194	RVKEEDESANSLRPGALFFS	INKTSPVTASDPAGPSYAAA	XRCC1	Q6IBS4	NA	NA	0.01	probably damaging	probably damaging	-0.07
rs2307191	snp	NON_SYNONYMOUS_CODING	1	G/A	602	602	-	-	44057768	44057768	CAAAGATGAGGCAGAGGCCC	GTCCCAGGTAAGCTGTACCT	P/L	161	161	PFGLSFVRFHSPPDKDEAEA	SQKVTVTKLGQFRVKEEDES	XRCC1	Q6IBS4	NA	NA	0.01	possibly damaging	possibly damaging	-0.75
rs2228487	snp	NON_SYNONYMOUS_CODING	1	C/T	440	440	1	IPR002706,Pfam,Xrcc1_N;	44058892	44058892	CAGTGGCTCAAACCCCAACC	CGTTCGCATGTTTGGGCCTG	R/H	107	107	LLVTSSFMSPSESRSGSNPN	VRMFGPDKLVRAAAEKRWDR	XRCC1	Q6IBS4	NA	NA	0	possibly damaging	possibly damaging	-0.75
