# Supplementary material for: Data Integration Workflow for Search of Disease Driving Genes and Genetic Variants
Source: PLoS One. 2011 Apr 12;6(4):e18636. doi: 10.1371/journal.pone.0018636 (PMC3075259; doi:10.1371/journal.pone.0018636)
Supplement: Table S5 — The central SNPs from the glioblastoma multiforme case study that show a survival effect either itself or through tagSNPs. Columns from survival analysis are the following: SurvivalMarker = the SNP for which survival is estimated, Hetero OR = the odds ratio between heterozygous and homozygous genotypes, Homo OR = the odds ratio between homozygous genotypes, pvalue = the p-value. (XLS) [file pone.0018636.s006.xls]

## Sheet: Sheet1
RsNum	Type	Consequence	SNPStrand	Alleles	TransLocationStart	TransLocationEnd	HitsDomain	DomainDescr	GenomLocationStart	GenomLocationEnd	PreGenSeq	SuccGenSeq	PeptAlleles	PeptLocationStart	PeptLocationEnd	PrePepSeq	SuccPepSeq	GenSymbol	SearchTerm	MinorAllele	TagSNPs_CEU	SiftPrediction	PolyPhen1	PolyPhen2	SNPs3D_profile	SurvivalMarker	Hetero OR	Homo OR	pvalue	survDiff
rs1805087	snp	NON_SYNONYMOUS_CODING	1	A/G	3150	3150	1	IPR011822,PIRSF,MetH;IPR006158,Superfamily,Cobalamin-bd;	237048500	237048500	ATATGAAGATATTAGACAGG	CCATTATGAGTCTCTCAAGG	D/G	919	919	ENLKDEYFEEIMEEYEDIRQ	HYESLKERRYLPLSQARKSG	MTR	Q99707	0.16	rs10158222,rs10158822,rs10925261,rs2275565	0.26	possibly damaging	probably damaging	0.84	rs2275565	0.668724	NA	0.00244443	NA
rs3206634	snp	3PRIME_UTR	1	T/C	4794	4794	-	-	135516203	135516203	GAGATTCATTTGCTTAACAT	TCTACATAATATTTATGGTC	-	-	-	-	-	SMAD5	Q99717	0.3	rs11242316,rs2287961,rs2287962,rs3206635,rs3734125,rs6596293,rs6596294,rs7731417,rs7732110	Not found	NA	NA	NA	rs3734125	2.08305	0.702332	0.00244543	NA
rs3206635	snp	3PRIME_UTR	1	G/A	4873	4873	-	-	135516282	135516282	TGAAATGTAAACTAGTAGGC	TGTTATTGATCTGCTAAAAC	-	-	-	-	-	SMAD5	Q99717	0.31	rs10045073,rs11242316,rs2287961,rs2287962,rs3734125,rs6596293,rs6596294,rs7731417,rs7732110	Not found	NA	NA	NA	rs3734125	2.08305	0.702332	0.00244543	NA
rs6596293	snp	3PRIME_UTR	1	A/G	5298	5298	-	-	135516707	135516707	TTGGAAGAGAATGTTTATAC	AAAAATGAAATTCTTCCAAC	-	-	-	-	-	SMAD5	Q99717	0.29	rs10041689,rs10045073,rs11242316,rs2287961,rs2287962,rs3734125,rs6596294,rs7731417,rs7732110	Not found	NA	NA	NA	rs3734125	2.08305	0.702332	0.00244543	NA
rs6596294	snp	3PRIME_UTR	1	T/C	5427	5427	-	-	135516836	135516836	TTTCTTTATACTTTTTCTAA	CAATTGCTTAATAGTACTTT	-	-	-	-	-	SMAD5	Q99717	0.3	rs10041689,rs10045073,rs11242316,rs2287961,rs2287962,rs3734125,rs7731417,rs7732110,rs7734045	Not found	NA	NA	NA	rs3734125	2.08305	0.702332	0.00244543	NA
rs6865297	snp	3PRIME_UTR	1	A/G	4299	4299	-	-	135515708	135515708	TCTCTTAGGAGTTGTGTCTC	TGAATGACAGTACTAAAGCT	-	-	-	-	-	SMAD5	Q99717	0.3	rs11242316,rs3206634,rs3206635,rs3734125,rs6596293,rs6596294,rs6886699,rs7731417,rs7732110	Not found	NA	NA	NA	rs3734125	2.08305	0.702332	0.00244543	NA
rs6886699	snp	3PRIME_UTR	1	T/C	4329	4329	-	-	135515738	135515738	GTACTAAAGCTATTAACAAC	AAGAGTTTGACAGAGAACTA	-	-	-	-	-	SMAD5	Q99717	0.3	rs11242316,rs2287961,rs3206634,rs3206635,rs3734125,rs6596293,rs6596294,rs7731417,rs7732110	Not found	NA	NA	NA	rs3734125	2.08305	0.702332	0.00244543	NA
rs17532679	snp	SYNONYMOUS_CODING	1	A/G	2243	2243	-	-	201437214	201437214	AATAAGAAGCTTAGGCAGAA	GTAAATCGGAAGACAGAAAT	K	715	715	ITNMYPVQQNESKVNKKLRQ	VNRKTEIISEVNHLDNDKSI	SGOL2	Q562F6	0.24	NA	Not found	NA	NA	NA	rs17532679	2.69192	NA	0.00372611	NA
rs6077759	snp	REGULATORY_REGION	1	A/G	-	-	-	-	1090679	1090679	CACCGCTGTCCCCATCAGCA	CCATGTTCTTGCAGGCTGGG	-	-	-	-	-	PSMF1	Q92530	0.33	rs6077768,rs6077792	Not found	NA	NA	NA	rs6077759	1.6338	2.92958	0.00381227	NA
rs1805087	snp	NON_SYNONYMOUS_CODING	1	A/G	3150	3150	1	IPR011822,PIRSF,MetH;IPR006158,Superfamily,Cobalamin-bd;	237048500	237048500	ATATGAAGATATTAGACAGG	CCATTATGAGTCTCTCAAGG	D/G	919	919	ENLKDEYFEEIMEEYEDIRQ	HYESLKERRYLPLSQARKSG	MTR	Q99707	0.16	rs10158222,rs10158822,rs10925261,rs2275565	0.26	possibly damaging	probably damaging	0.84	rs10158222	0.631579	NA	0.00404241	NA
rs7107335	snp	SYNONYMOUS_CODING	1	C/G	941	941	-	-	44640640	44640640	ATCTGCTTGTGCCGGCACGT	CATTCCGAAGACTACAGCAA	V	231	231	VGVAIIELLGMVLSICLCRH	HSEDYSKVPKY	CD82	Q7Z5N2	0.17	NA	Not found	NA	NA	NA	rs7107335	0.55384	NA	0.0048498	NA
rs2491231	snp	SPLICE_SITE	1	A/G	-	-	-	-	28610183	28610183	ATTTCACACGTTCTTTTCTA	AGGGAAACCTCAAGTGCTCG	-	-	-	-	-	FLT3	P36888	0.2	rs2491236,rs2491237,rs2504234	Not found	NA	NA	NA	rs2491237	0.412103	NA	0.00524667	NA
rs7228940	snp	NON_SYNONYMOUS_CODING	1	G/A	4711	4711	-	-	13068109	13068109	ACAGAACGCTGTAGCCTGGC	CTGTTTCACGTTTTCCAAGG	R/H	1544	1544	NRTHATVPIRLIINANAVAW	CFTFSKESVRAPVEVAPCAD	CEP192	Q8TEP8	0.14	rs12607682,rs3809907,rs3809908	0.33	possibly damaging	possibly damaging	0.28	rs3809908	0.357143	NA	0.00531193	NA
rs607230	snp	NON_SYNONYMOUS_CODING	1	T/C	6098	6098	1	-	6980523	6980523	TGATACTTAGAGCAATTCCT	AAGGTAAGTGGAAAGGACTT	K/E	2002	2002	NAVEITRQTNESLLILRAIP	GIRDKGAKTKELATSASQSA	LAMA1	Q7Z5W6	0.34	rs538815	0.54	benign	benign	NA	rs607230	0.353851	NA	0.00535643	NA
rs3733619	snp	3PRIME_UTR	1	A/G	4227	4227	-	-	114373255	114373255	CTTGTAACACTTTGATGTTA	CATTTCTGGGATACAGGCAA	-	-	-	-	-	CAMK2D	Q13557	0.12	NA	Not found	NA	NA	NA	rs3733619	5.68116	NA	0.00676658	NA
rs12719481	snp	3PRIME_UTR	1	A/G	2646	2646	-	-	135514055	135514055	TTTTTAGCATAACCTTTGAT	AAATACACTCAAGTGACTTG	-	-	-	-	-	SMAD5	Q99717	0.3	rs11242316,rs3206634,rs3206635,rs6596293,rs6596294,rs6865297,rs6886699	Not found	NA	NA	NA	rs11242316	2.04714	0.746228	0.00706231	NA
rs3206634	snp	3PRIME_UTR	1	T/C	4794	4794	-	-	135516203	135516203	GAGATTCATTTGCTTAACAT	TCTACATAATATTTATGGTC	-	-	-	-	-	SMAD5	Q99717	0.3	rs11242316,rs2287961,rs2287962,rs3206635,rs3734125,rs6596293,rs6596294,rs7731417,rs7732110	Not found	NA	NA	NA	rs11242316	2.04714	0.746228	0.00706231	NA
rs3206635	snp	3PRIME_UTR	1	G/A	4873	4873	-	-	135516282	135516282	TGAAATGTAAACTAGTAGGC	TGTTATTGATCTGCTAAAAC	-	-	-	-	-	SMAD5	Q99717	0.31	rs10045073,rs11242316,rs2287961,rs2287962,rs3734125,rs6596293,rs6596294,rs7731417,rs7732110	Not found	NA	NA	NA	rs11242316	2.04714	0.746228	0.00706231	NA
rs6596293	snp	3PRIME_UTR	1	A/G	5298	5298	-	-	135516707	135516707	TTGGAAGAGAATGTTTATAC	AAAAATGAAATTCTTCCAAC	-	-	-	-	-	SMAD5	Q99717	0.29	rs10041689,rs10045073,rs11242316,rs2287961,rs2287962,rs3734125,rs6596294,rs7731417,rs7732110	Not found	NA	NA	NA	rs11242316	2.04714	0.746228	0.00706231	NA
rs6596294	snp	3PRIME_UTR	1	T/C	5427	5427	-	-	135516836	135516836	TTTCTTTATACTTTTTCTAA	CAATTGCTTAATAGTACTTT	-	-	-	-	-	SMAD5	Q99717	0.3	rs10041689,rs10045073,rs11242316,rs2287961,rs2287962,rs3734125,rs7731417,rs7732110,rs7734045	Not found	NA	NA	NA	rs11242316	2.04714	0.746228	0.00706231	NA
rs6865297	snp	3PRIME_UTR	1	A/G	4299	4299	-	-	135515708	135515708	TCTCTTAGGAGTTGTGTCTC	TGAATGACAGTACTAAAGCT	-	-	-	-	-	SMAD5	Q99717	0.3	rs11242316,rs3206634,rs3206635,rs3734125,rs6596293,rs6596294,rs6886699,rs7731417,rs7732110	Not found	NA	NA	NA	rs11242316	2.04714	0.746228	0.00706231	NA
rs6886699	snp	3PRIME_UTR	1	T/C	4329	4329	-	-	135515738	135515738	GTACTAAAGCTATTAACAAC	AAGAGTTTGACAGAGAACTA	-	-	-	-	-	SMAD5	Q99717	0.3	rs11242316,rs2287961,rs3206634,rs3206635,rs3734125,rs6596293,rs6596294,rs7731417,rs7732110	Not found	NA	NA	NA	rs11242316	2.04714	0.746228	0.00706231	NA
rs2282542	snp	NON_SYNONYMOUS_CODING	1	G/A	4173	4173	-	-	13056682	13056682	TTGAACCATGGGATTCAGGA	TGACATCAGGATTGGGTAAG	V/M	1365	1365	KPFPVPSVGTNCGIEPWDSG	TSGLGSVRVPEELKLPHACC	CEP192	Q8TEP8	0.15	rs12606033,rs6650617,rs7236987	0.41	benign	benign	1.0	rs7236987	0.369048	NA	0.00713514	NA
rs1036673	snp	3PRIME_UTR	1	C/T	3858	3858	-	-	74338462	74338462	AATGGGCTGATTGGCCTCCA	GGTCAGAGCGGCCATCTGGC	-	-	-	-	-	PML	P29590	0.23	rs6772,rs8024150,rs8029133	Not found	NA	NA	NA	rs6772	0.412103	NA	0.00774677	NA
rs1052812	snp	3PRIME_UTR	1	C/T	6674	6674	-	-	33538041	33538041	ATTAACTACATAATGGAAAA	TATGGTTTAATGTGTCCAAA	-	-	-	-	-	CLASP2	O75122	0.44	rs1532590,rs4679039,rs4679044,rs6772776,rs6782108	Not found	NA	NA	NA	rs6772	0.412103	NA	0.00774677	NA
rs10764	snp	3PRIME_UTR	1	A/G	6685	6685	-	-	33538030	33538030	AATGGAAAAGTATGGTTTAA	GTGTCCAAATGAAAGCTAGT	-	-	-	-	-	CLASP2	O75122	0.44	rs1052812,rs1532590,rs4679039,rs4679044,rs6772776,rs6782108	Not found	NA	NA	NA	rs6772	0.412103	NA	0.00774677	NA
rs6772	snp	3PRIME_UTR	1	C/T	4335	4335	-	-	74338939	74338939	CTGATGCCAGACTGTTAAAA	AGGCGCTGGTTCTGAAGCAC	-	-	-	-	-	PML	P29590	0.22	rs8024150	Not found	NA	NA	NA	rs6772	0.412103	NA	0.00774677	NA
rs3803825	snp	SYNONYMOUS_CODING	1	A/G	784	784	-	-	51901084	51901084	AACCAGCGAGAGACAACCTT	AAGGACCTGGATATCATCAC	L	230	230	QEHRICVCVRKRPLNQRETT	KDLDIITVPSDNVVMVHESK	KIF2B	Q8N4N8	0.17	rs4561518,rs4561519,rs4794469	Not found	NA	NA	NA	rs4561519	2.77891	NA	0.00777473	NA
rs4561518	snp	NON_SYNONYMOUS_CODING	1	C/T	1343	1343	1	,Superfamily,;IPR001752,Prints,Kinesin_motor_dom;IPR001752,Pfam,Kinesin_motor_dom;IPR001752,Smart,Kinesin_motor_dom;	51901643	51901643	GTCGGACTTCCAGGCAAACA	CTGTCAACGCTCACTCATCC	P/S	417	417	VEEVLNLVEIGNSCRTSRQT	VNAHSSRSHAVFQIILKSGR	KIF2B	Q8N4N8	0.18	rs4561519	1	probably damaging	possibly damaging	-1.0	rs4561519	2.77891	NA	0.00777473	NA
rs4561519	snp	NON_SYNONYMOUS_CODING	1	C/G	1403	1403	1	,Superfamily,;IPR001752,Pfam,Kinesin_motor_dom;IPR001752,Smart,Kinesin_motor_dom;	51901703	51901703	AGATCATCCTGAAGTCAGGA	GGATAATGCATGGCAAGTTT	R/G	437	437	PVNAHSSRSHAVFQIILKSG	IMHGKFSLVDLAGNERGADT	KIF2B	Q8N4N8	0.16	rs4794469	1	possibly damaging	benign	0.27	rs4561519	2.77891	NA	0.00777473	NA
rs164390	snp	5PRIME_UTR	1	G/T	178	178	-	-	68463014	68463014	CGGCTGTTGGTTTCTGCTGG	TGTAGGTCCTTGGCTGGTCG	-	-	-	-	-	CCNB1	P14635	0.45	rs100192,rs163443	Not found	NA	NA	NA	rs100192	1.05372	0.272727	0.00807523	NA
rs35671	snp	NON_SYNONYMOUS_CODING	1	C/T	514	514	-	-	10353626	10353626	GAGTCCATCCCCTGCCTTTC	TGCAGTGAGAGCGCCTGCCT	R/H	158	158	GQWEVKKINNAHTVSPSPAF	AVRAPALPRVCCSLPRGWHG	SEC13	P55735	0.27	rs154237,rs154238,rs28349	Not found	NA	NA	NA	rs154238	1.82647	NA	0.00946674	NA
rs12719481	snp	3PRIME_UTR	1	A/G	2646	2646	-	-	135514055	135514055	TTTTTAGCATAACCTTTGAT	AAATACACTCAAGTGACTTG	-	-	-	-	-	SMAD5	Q99717	0.3	rs11242316,rs3206634,rs3206635,rs6596293,rs6596294,rs6865297,rs6886699	Not found	NA	NA	NA	rs6886699	2.08537	0.804878	0.00959796	NA
rs4585442	snp	NON_SYNONYMOUS_CODING	1	A/G	501	501	1	IPR001132,pfscan,SMAD_dom_Dwarfin-type;IPR001132,Pfam,SMAD_dom_Dwarfin-type;	135508381	135508381	CCTACATTTAATCGAATTCA	TCATTTGTTGTACTTGCCAT	N/S	168	168	NTRRHIGKGNLVIFLHLIEF	HLLYLP	SMAD5	Q99717	0.31	rs12719481,rs3206634,rs3206635,rs6596293,rs6596294,rs6865297,rs6886699	Not found	NA	NA	NA	rs6886699	2.08537	0.804878	0.00959796	NA
rs6865297	snp	3PRIME_UTR	1	A/G	4299	4299	-	-	135515708	135515708	TCTCTTAGGAGTTGTGTCTC	TGAATGACAGTACTAAAGCT	-	-	-	-	-	SMAD5	Q99717	0.3	rs11242316,rs3206634,rs3206635,rs3734125,rs6596293,rs6596294,rs6886699,rs7731417,rs7732110	Not found	NA	NA	NA	rs6886699	2.08537	0.804878	0.00959796	NA
rs6886699	snp	3PRIME_UTR	1	T/C	4329	4329	-	-	135515738	135515738	GTACTAAAGCTATTAACAAC	AAGAGTTTGACAGAGAACTA	-	-	-	-	-	SMAD5	Q99717	0.3	rs11242316,rs2287961,rs3206634,rs3206635,rs3734125,rs6596293,rs6596294,rs7731417,rs7732110	Not found	NA	NA	NA	rs6886699	2.08537	0.804878	0.00959796	NA
rs3206635	snp	3PRIME_UTR	1	G/A	4873	4873	-	-	135516282	135516282	TGAAATGTAAACTAGTAGGC	TGTTATTGATCTGCTAAAAC	-	-	-	-	-	SMAD5	Q99717	0.31	rs10045073,rs11242316,rs2287961,rs2287962,rs3734125,rs6596293,rs6596294,rs7731417,rs7732110	Not found	NA	NA	NA	rs10045073	1.96276	0.685408	0.00968063	NA
rs6596293	snp	3PRIME_UTR	1	A/G	5298	5298	-	-	135516707	135516707	TTGGAAGAGAATGTTTATAC	AAAAATGAAATTCTTCCAAC	-	-	-	-	-	SMAD5	Q99717	0.29	rs10041689,rs10045073,rs11242316,rs2287961,rs2287962,rs3734125,rs6596294,rs7731417,rs7732110	Not found	NA	NA	NA	rs10045073	1.96276	0.685408	0.00968063	NA
rs6596294	snp	3PRIME_UTR	1	T/C	5427	5427	-	-	135516836	135516836	TTTCTTTATACTTTTTCTAA	CAATTGCTTAATAGTACTTT	-	-	-	-	-	SMAD5	Q99717	0.3	rs10041689,rs10045073,rs11242316,rs2287961,rs2287962,rs3734125,rs7731417,rs7732110,rs7734045	Not found	NA	NA	NA	rs10045073	1.96276	0.685408	0.00968063	NA
